# Supplementary material for: Highly N2-selective allylation of NH-1,2,3-triazoles with allenamides mediated by N-iodosuccinimide
Source: Royal Society of Chemistry journal article supplement (doi:10.1039/c9nj03014j), 2019-01-01

## Supporting Information

for

### Highly $N^2$ -selective allylation of *NH*-1,2,3-triazoles with allenamides mediated by *N*-iodosuccinimide

Xi Jia Ai Ti Re He Man, Yong Chun Liu, Xiao Xiao Li\* and Zhi Gang Zhao\*

College of Chemistry and Environmental Protection Engineering, Southwest Minzu

University, Chengdu 610041, PR China

[lixiaoxiao.2005@163.com](mailto:lixiaoxiao.2005@163.com)

[zzg63129@163.com](mailto:zzg63129@163.com)

#### Table of contents

|                                                  |         |
|--------------------------------------------------|---------|
| 1. NMR Spectra for <b>4aa</b> – <b>4pa</b> ..... | S2-S18  |
| 2. NMR Spectra for <b>4ab</b> – <b>4ak</b> ..... | S19-S30 |
| 3. NMR Spectra for <b>5</b> .....                | S31     |
| 4. NMR Spectra for <b>6</b> .....                | S32     |

# 1. NMR Spectra for 4aa – 4pa

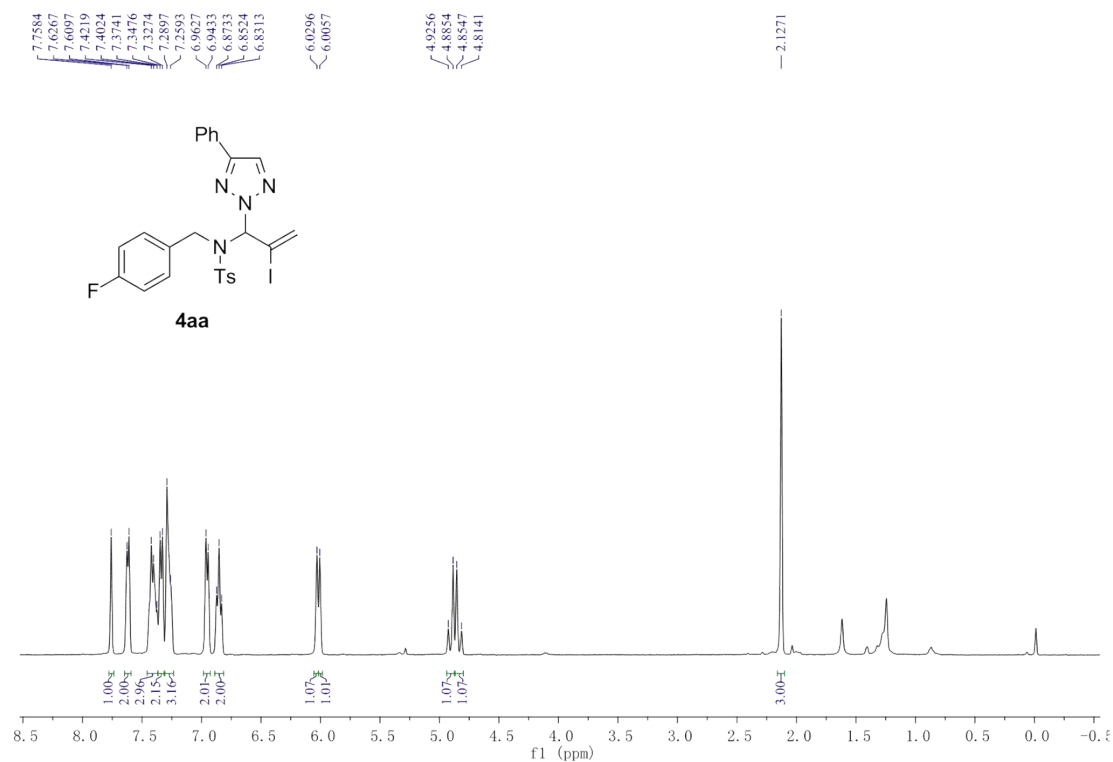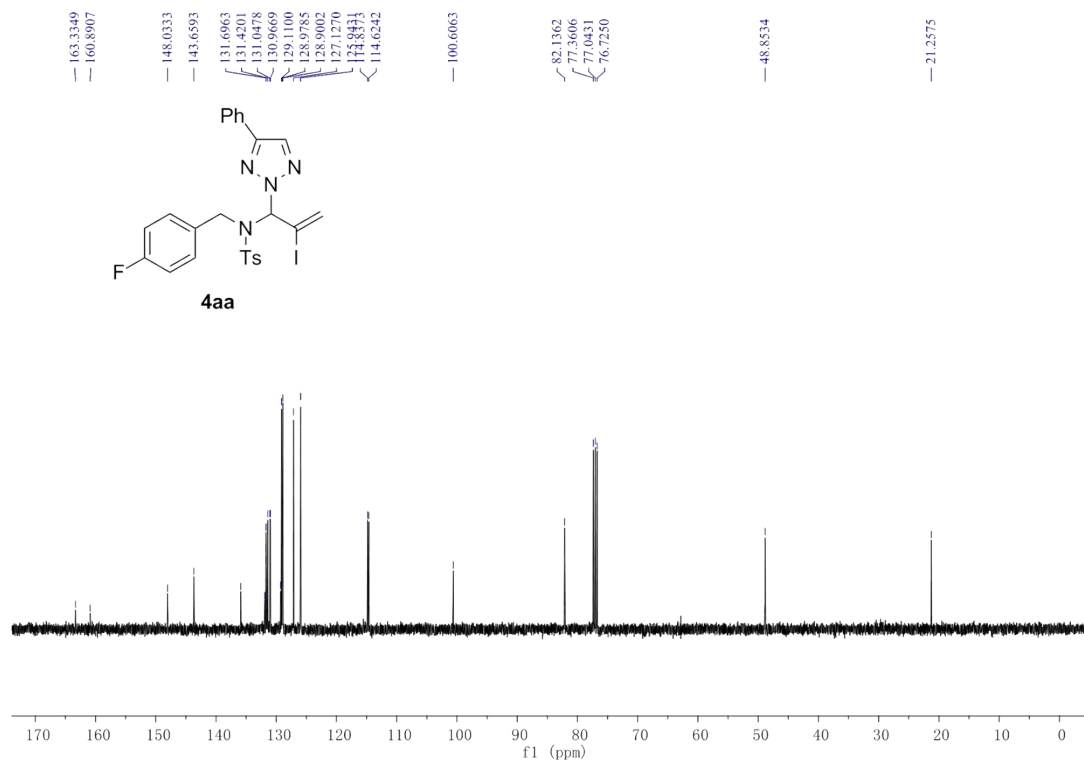

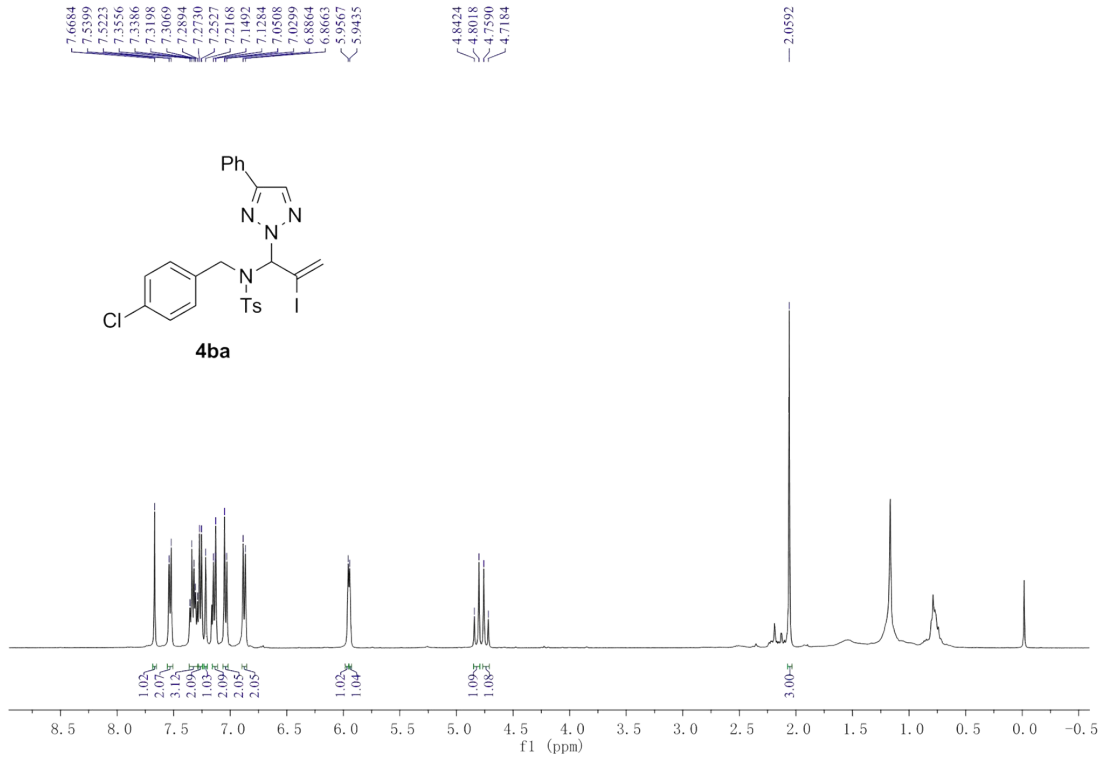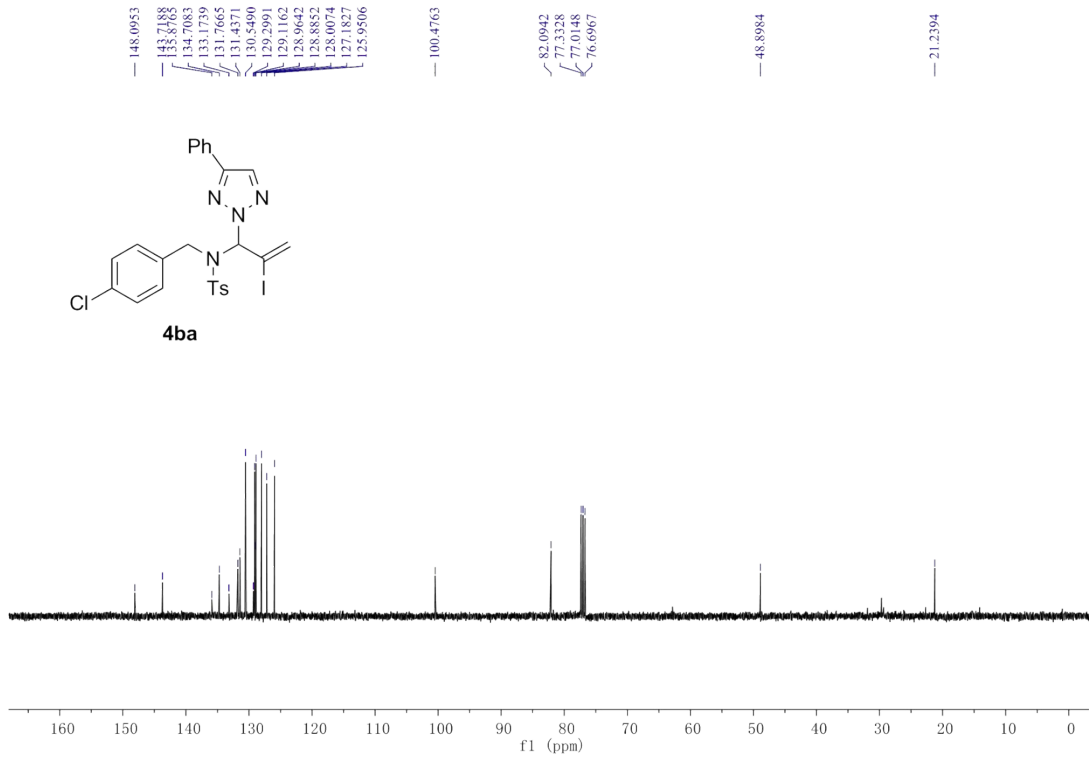

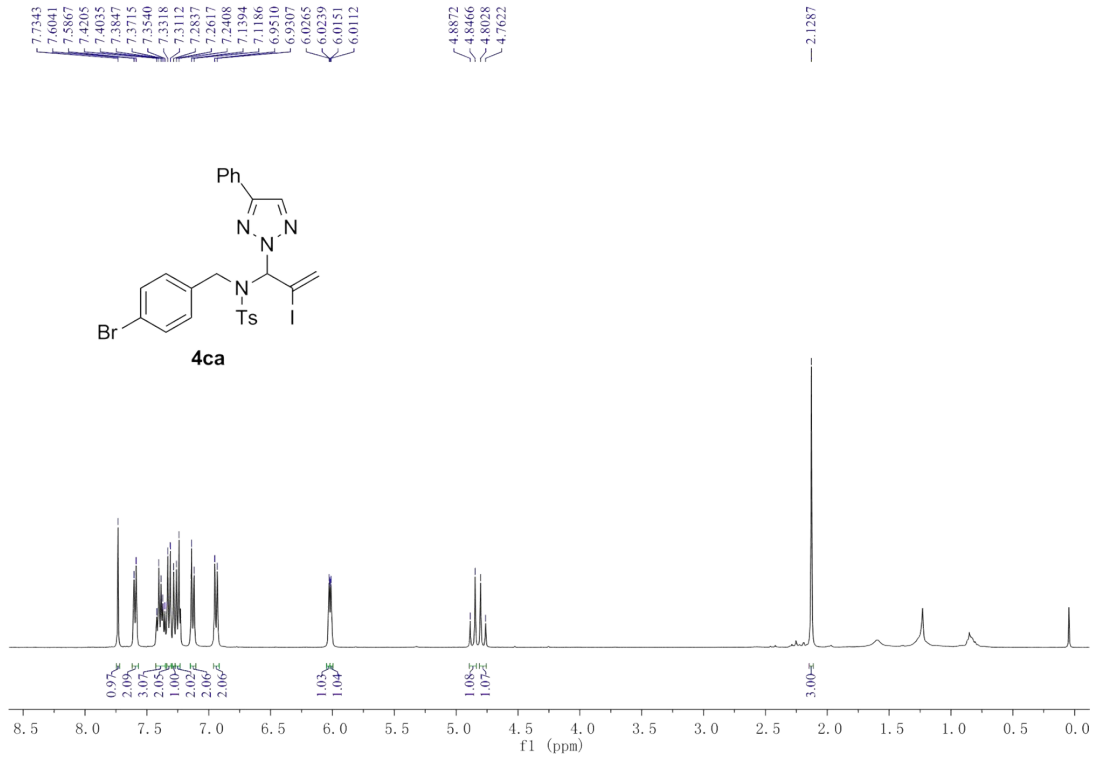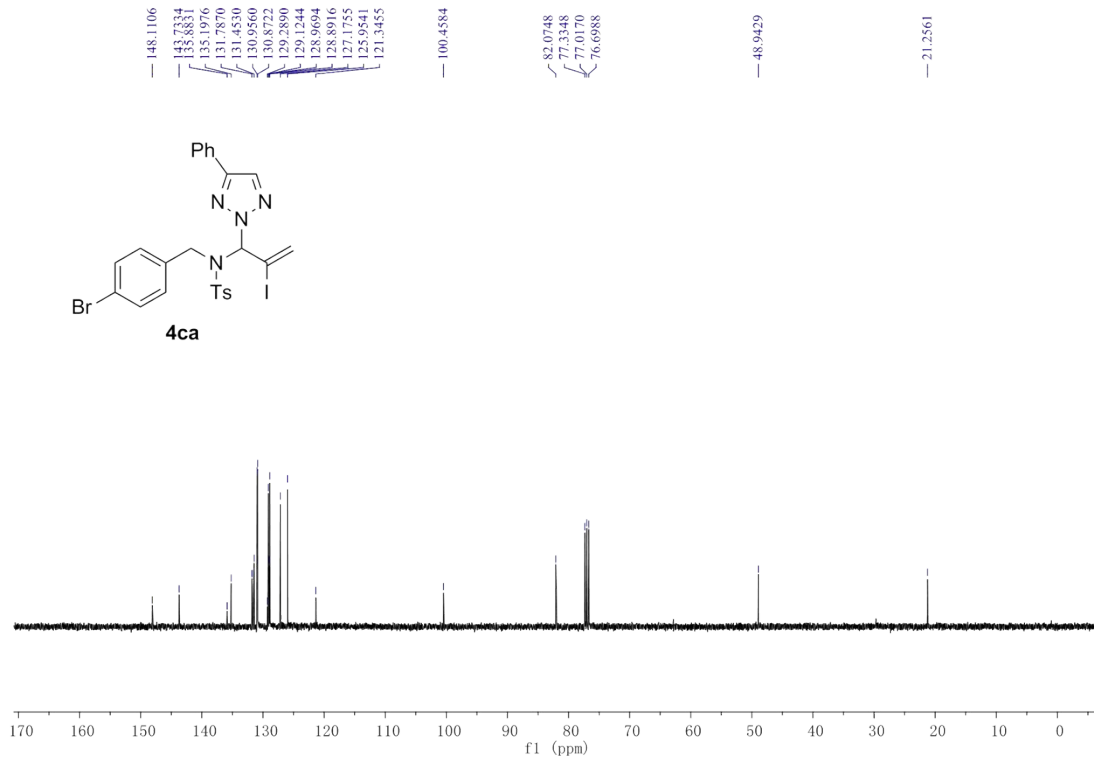

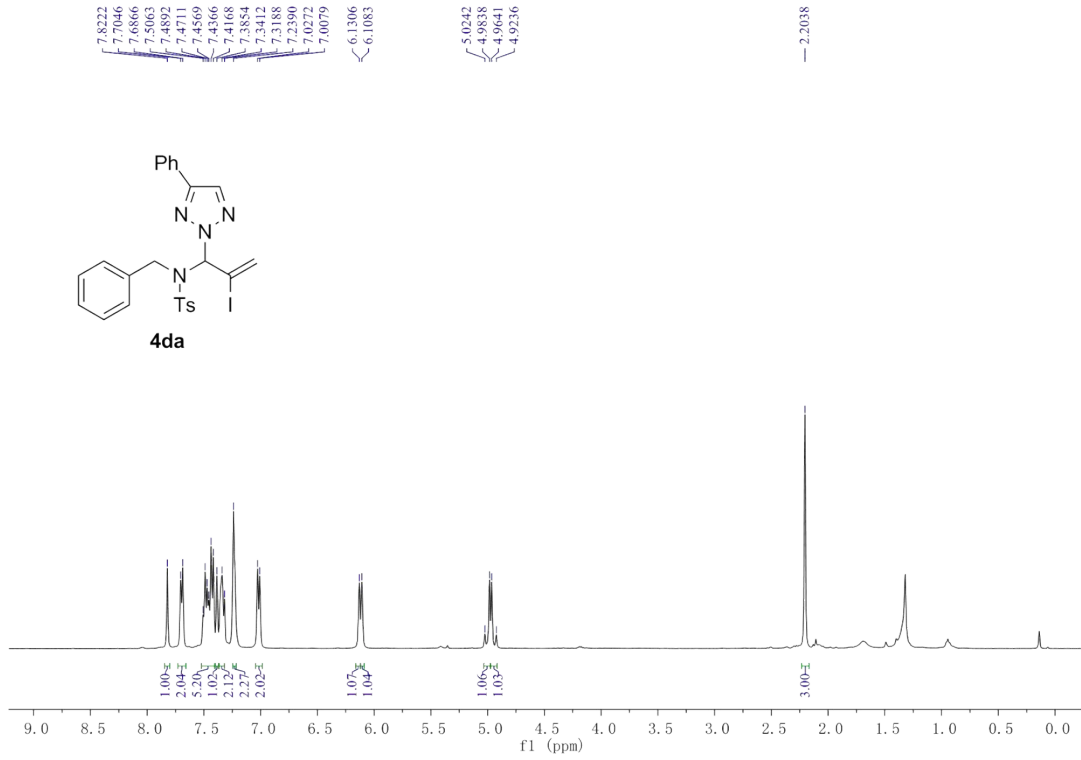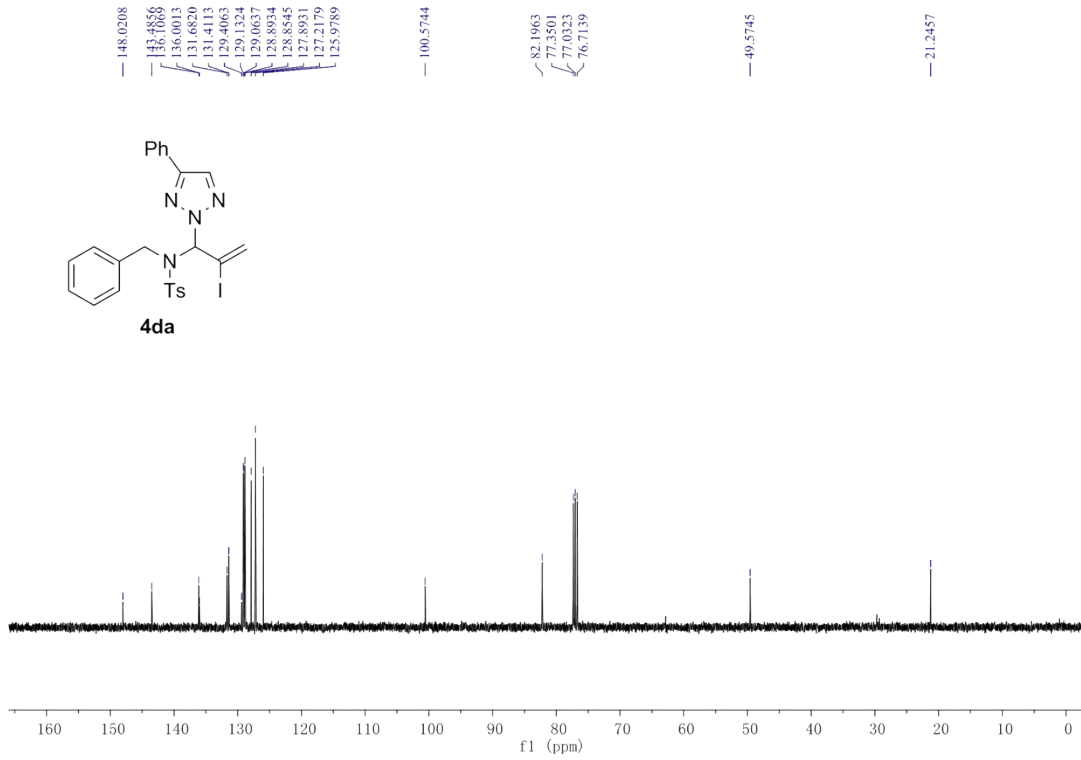

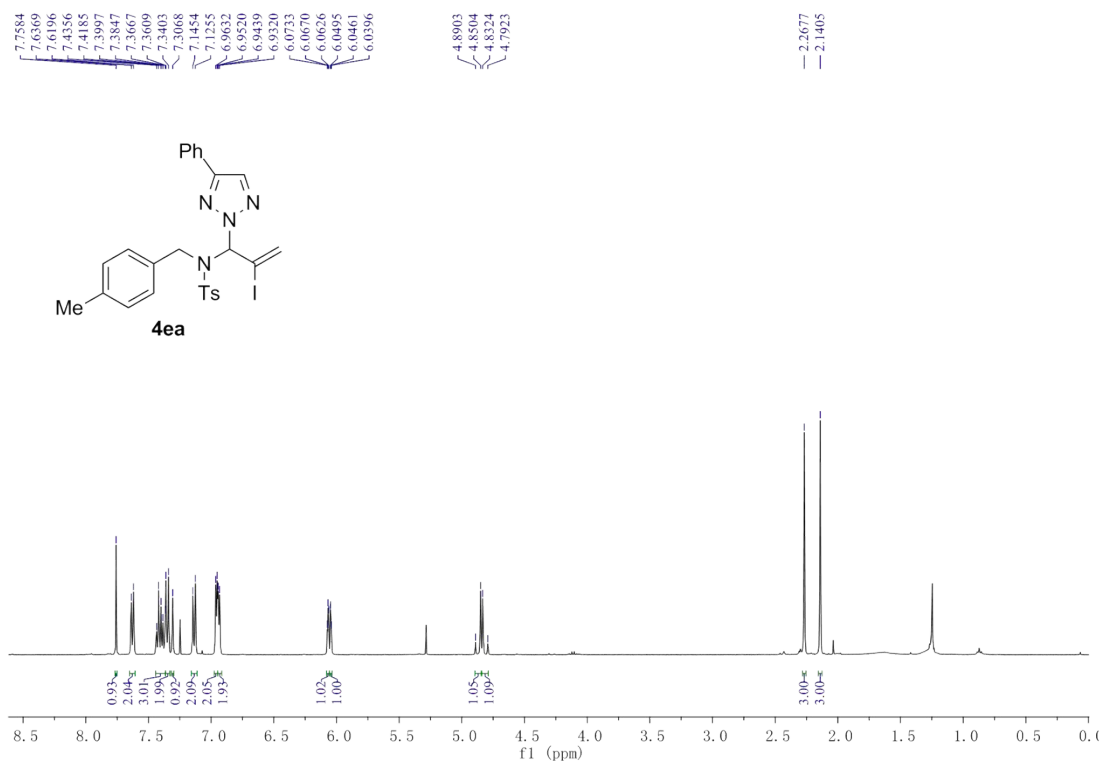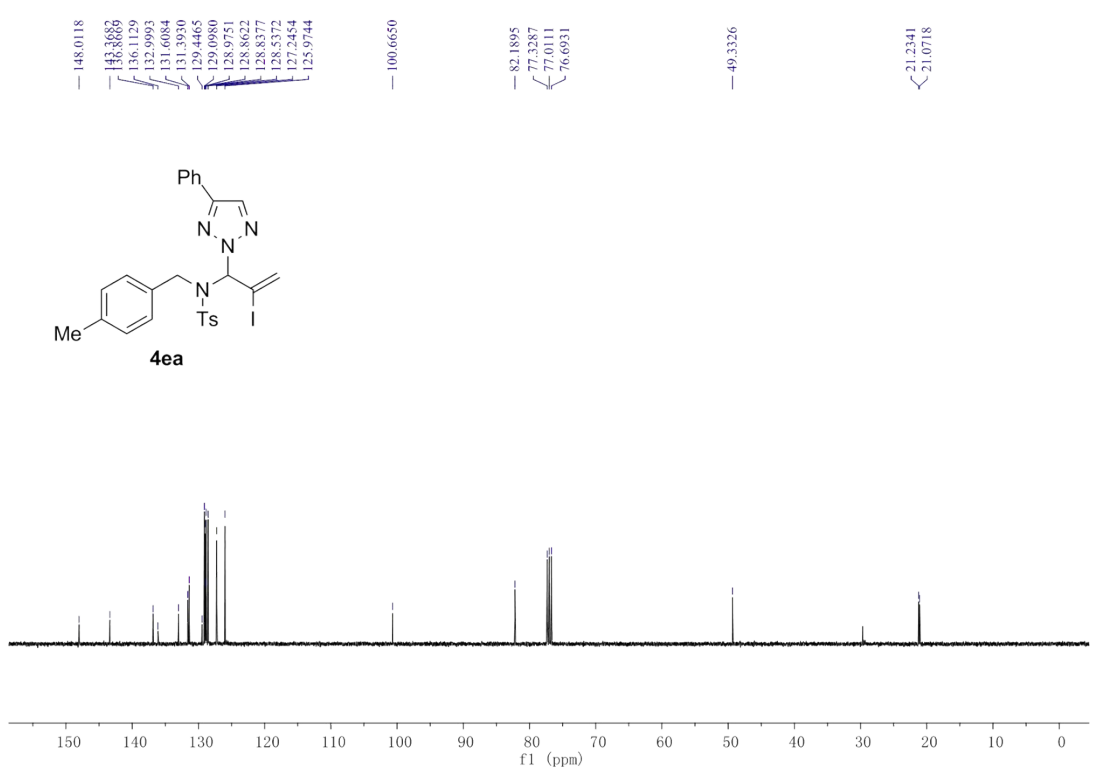

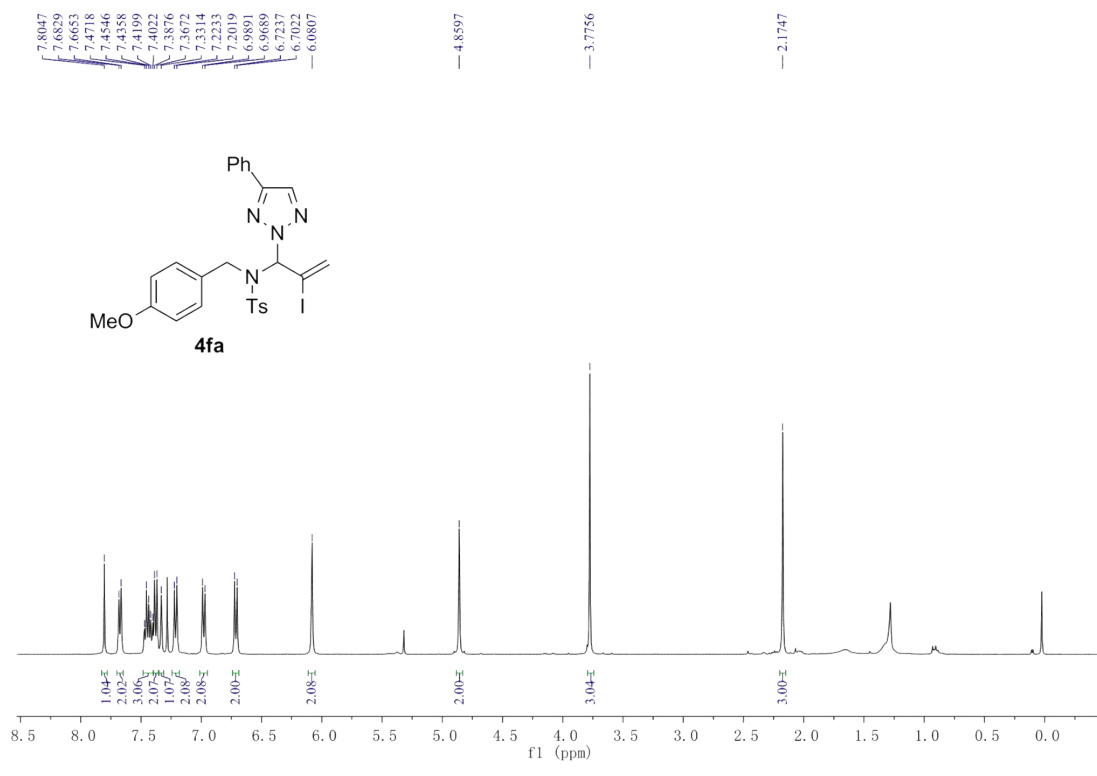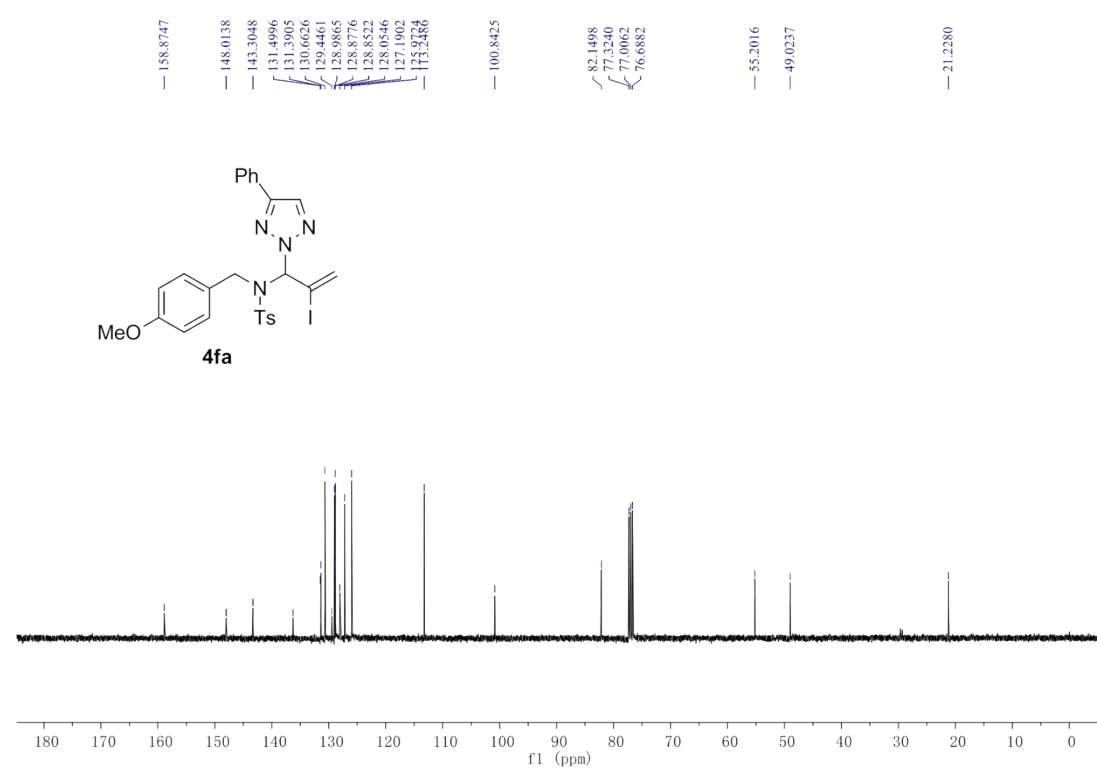

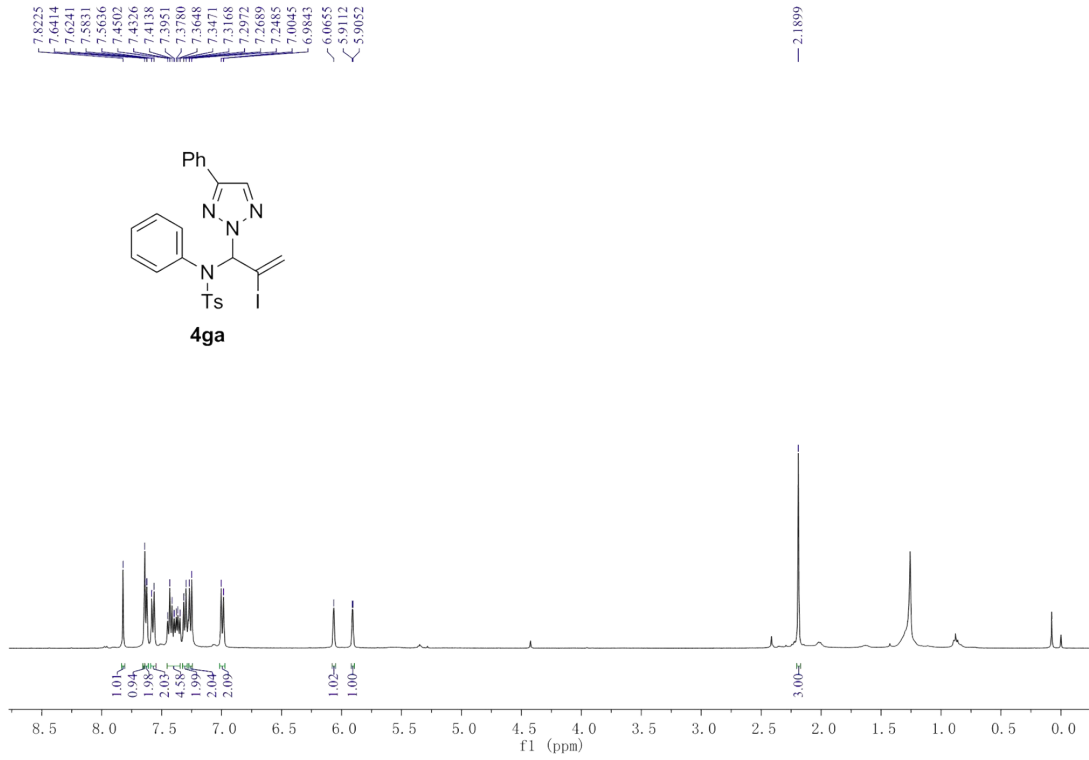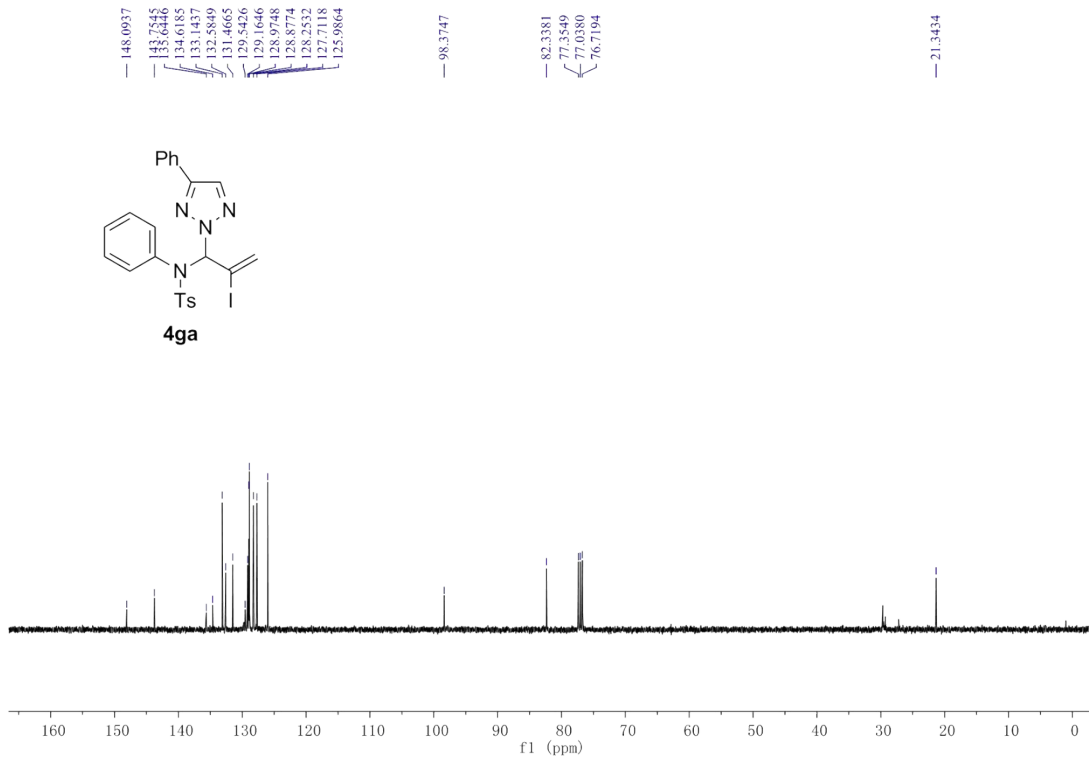



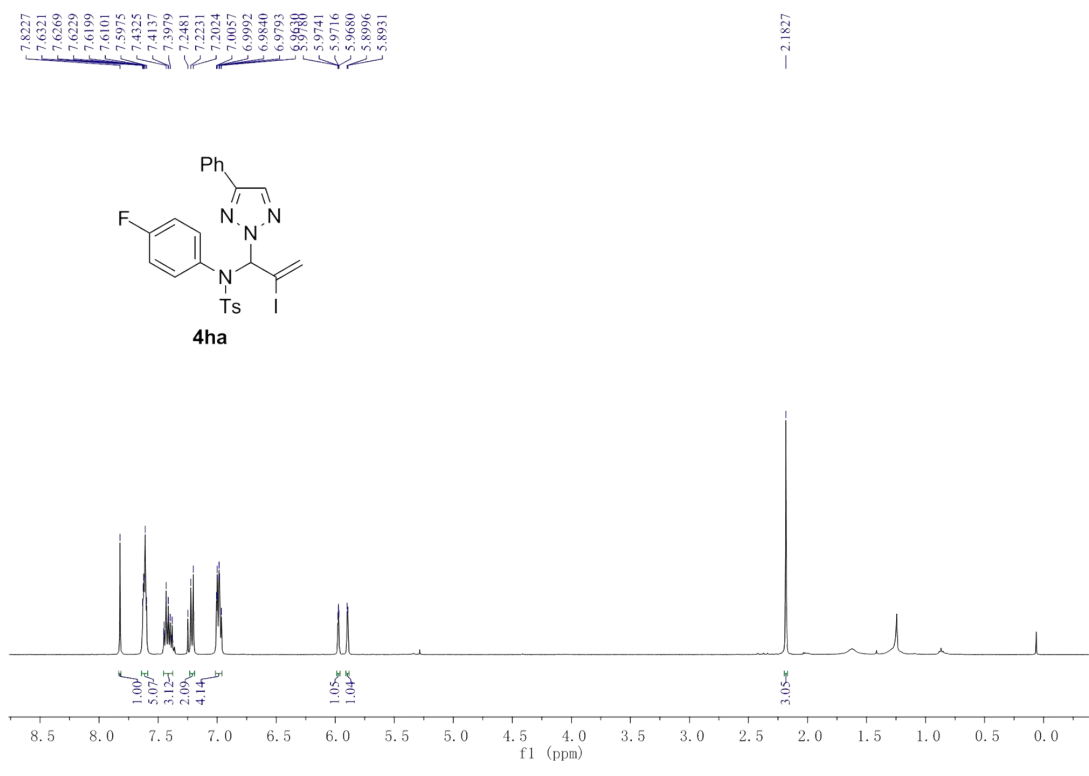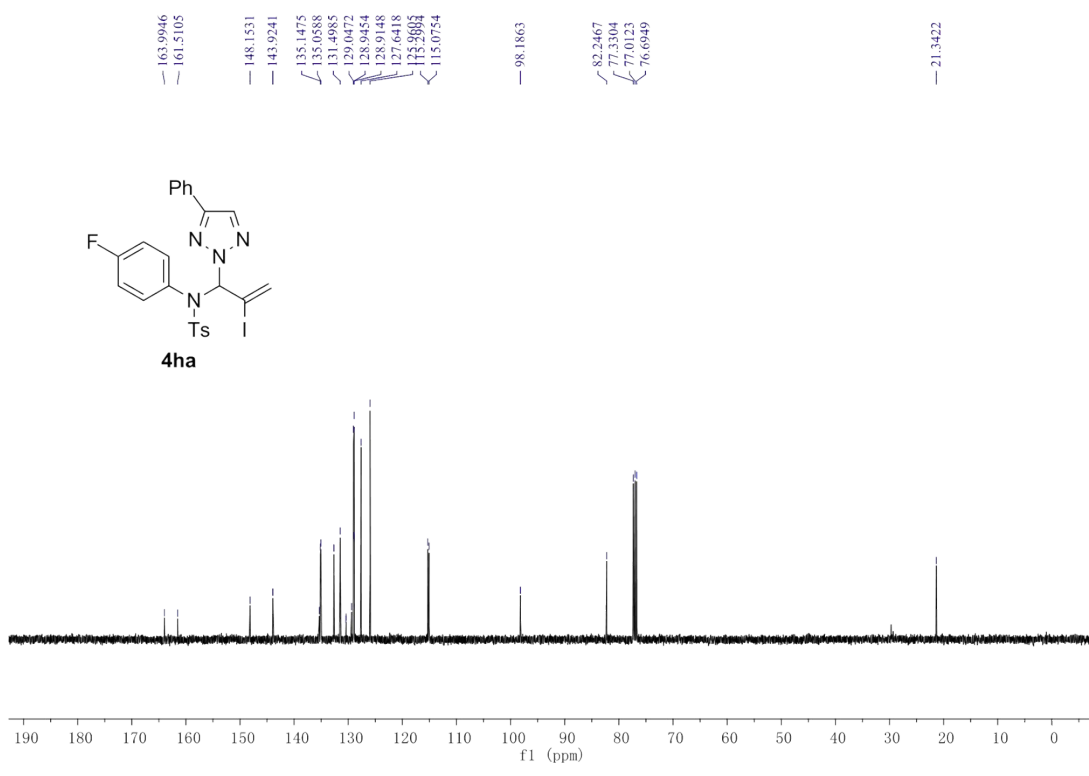

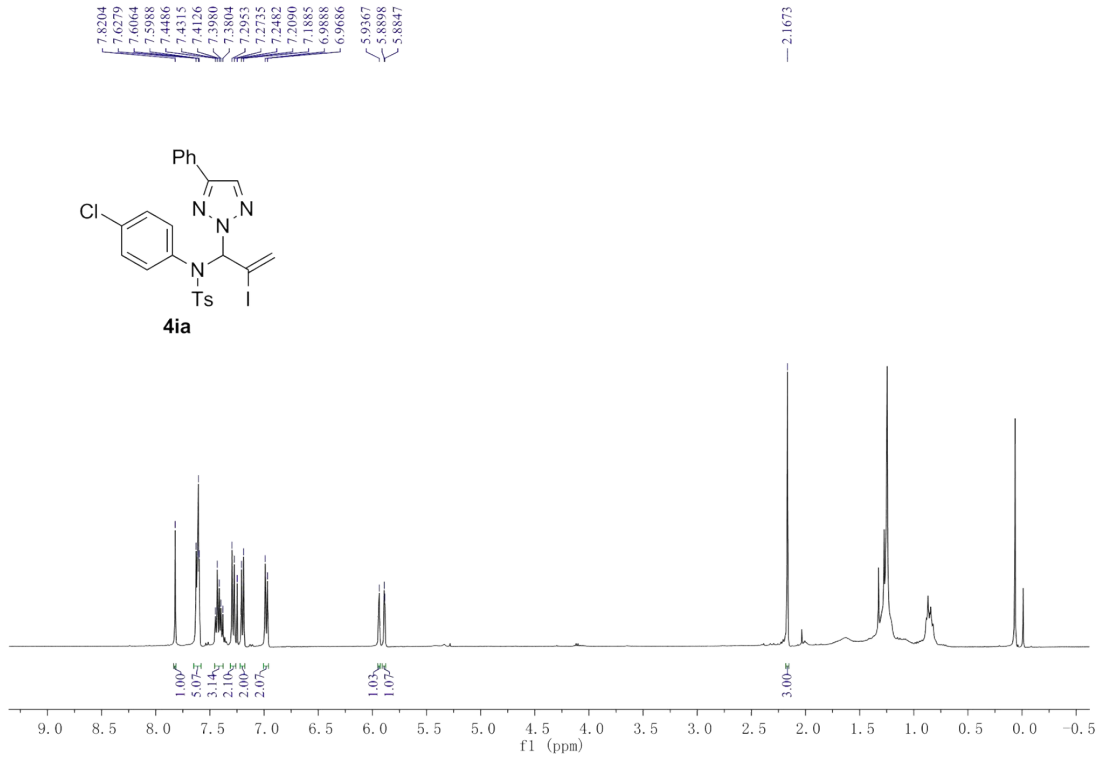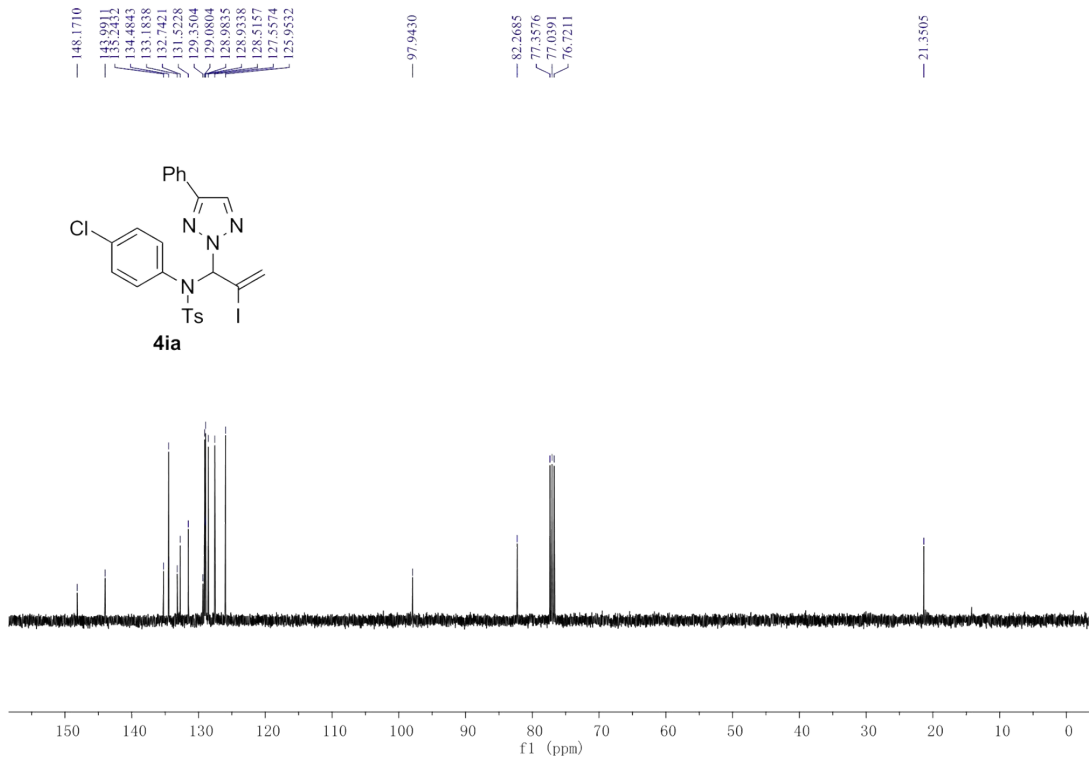

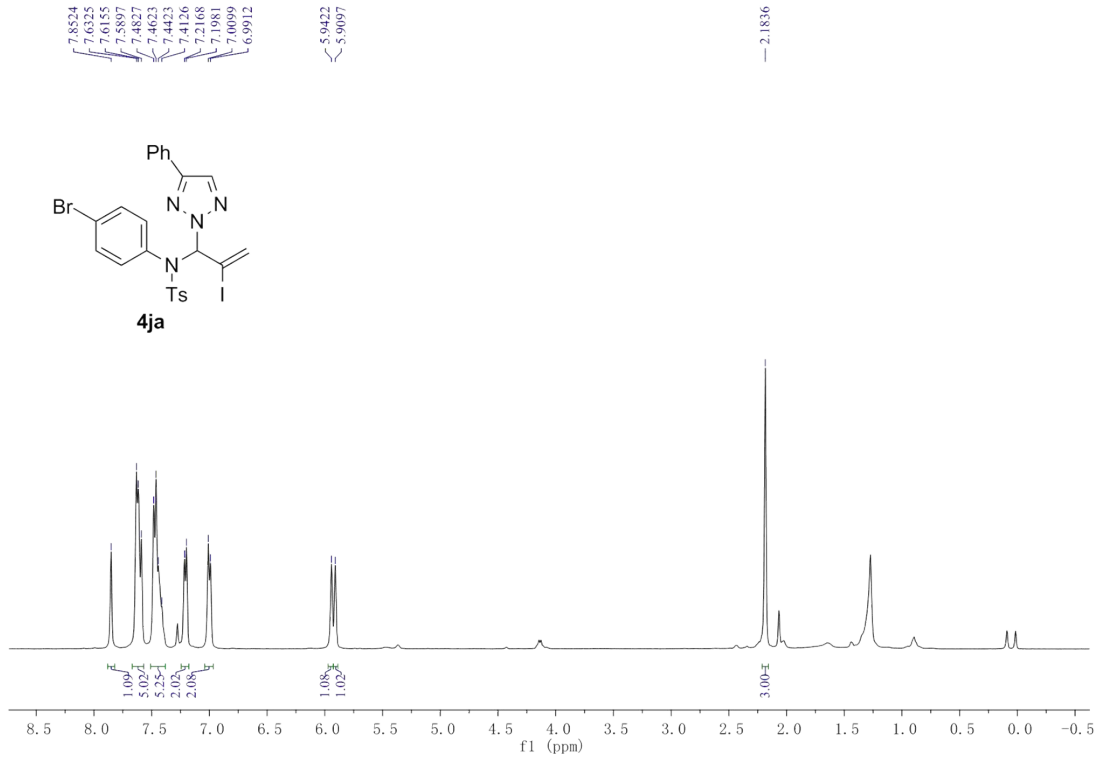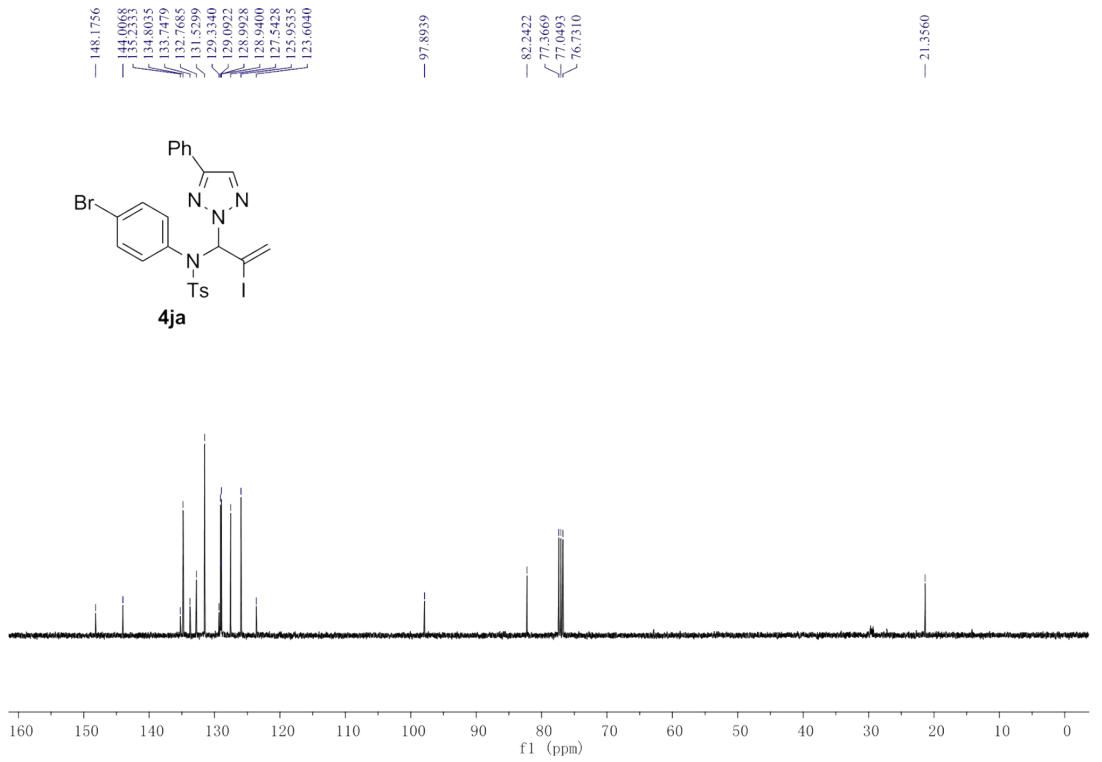

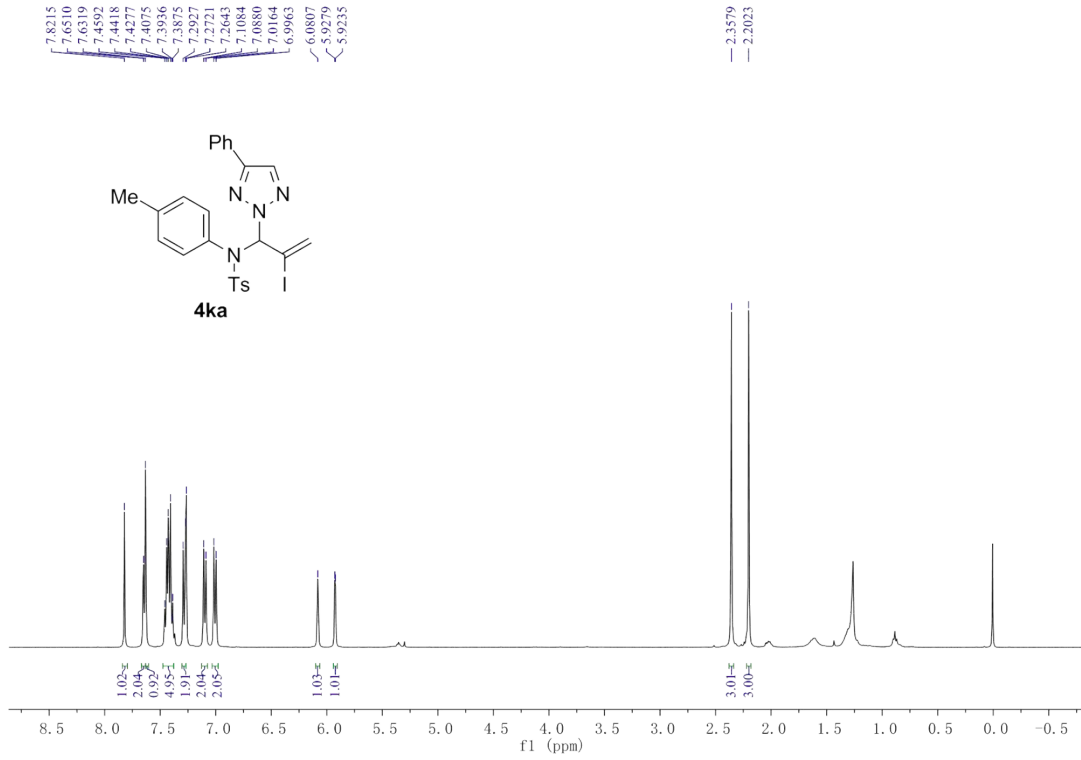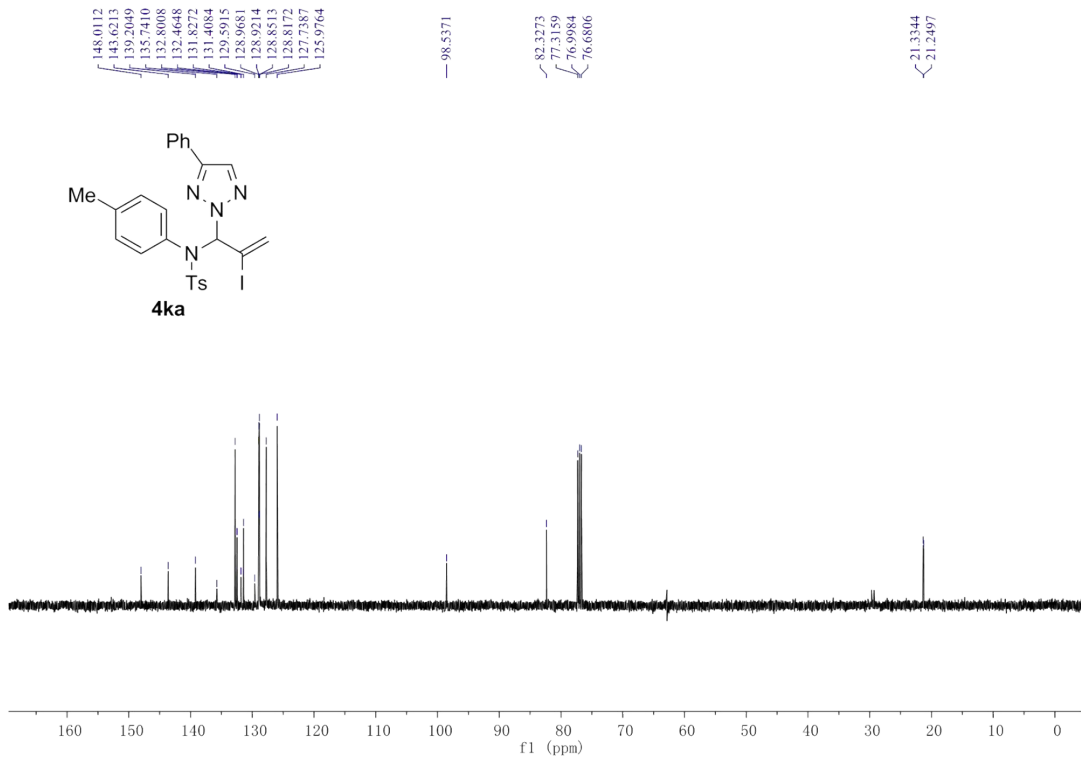

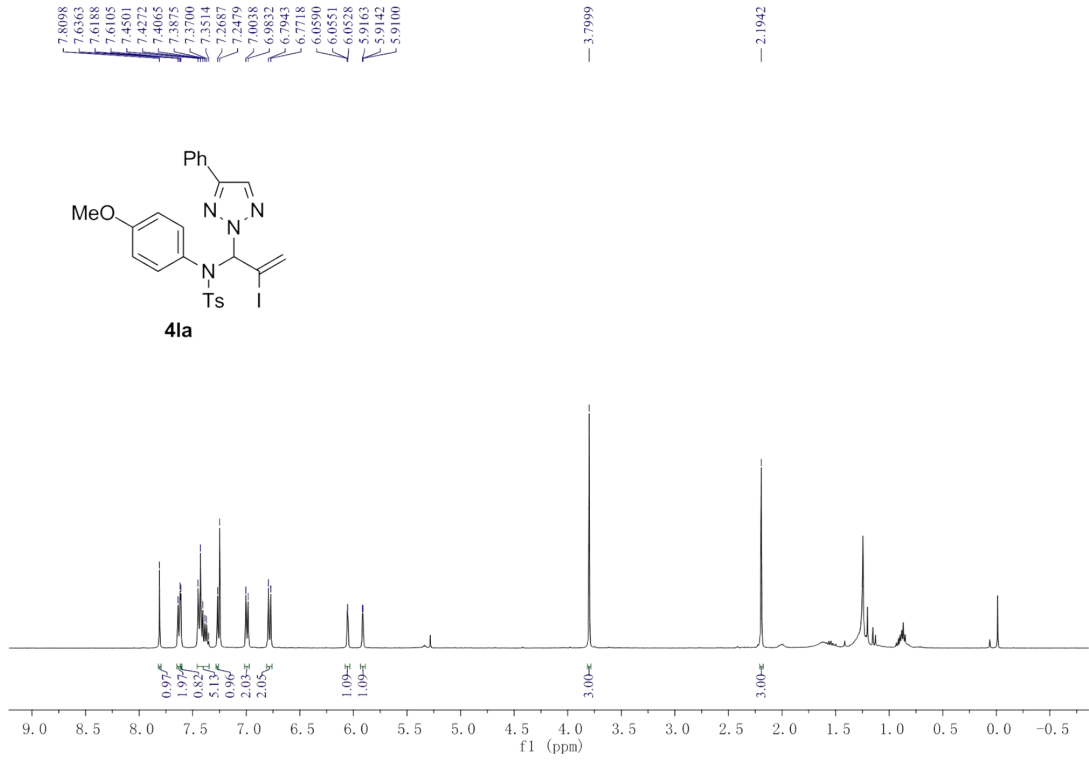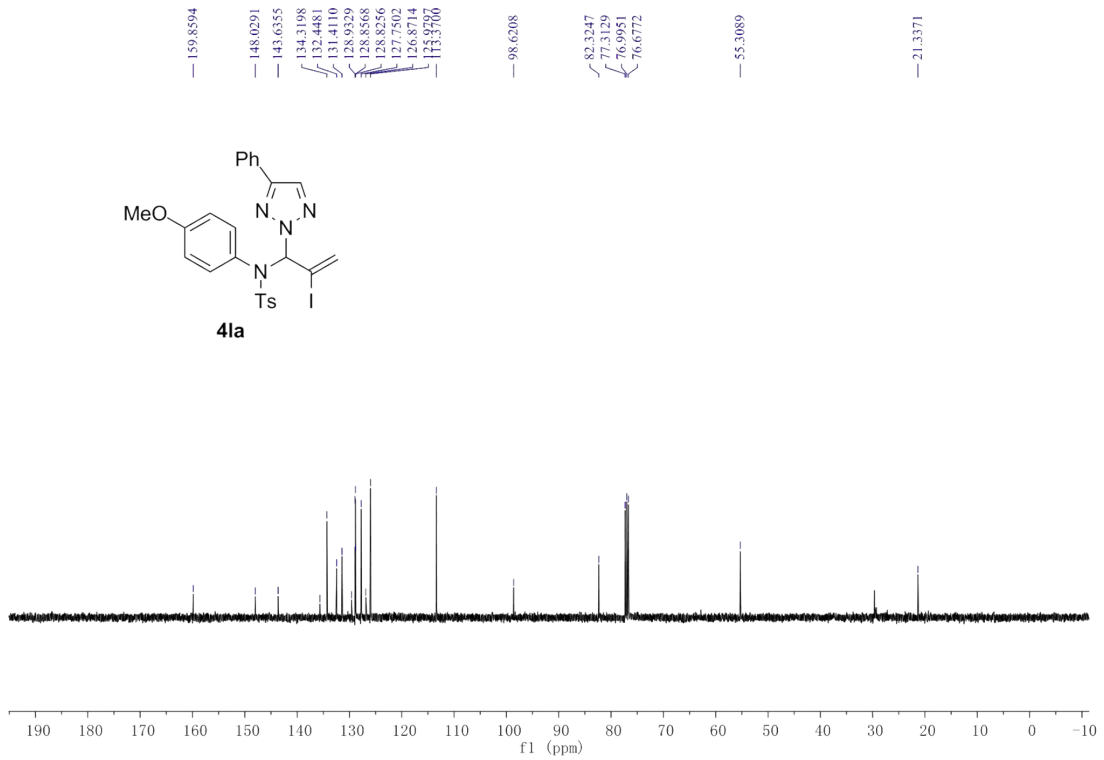

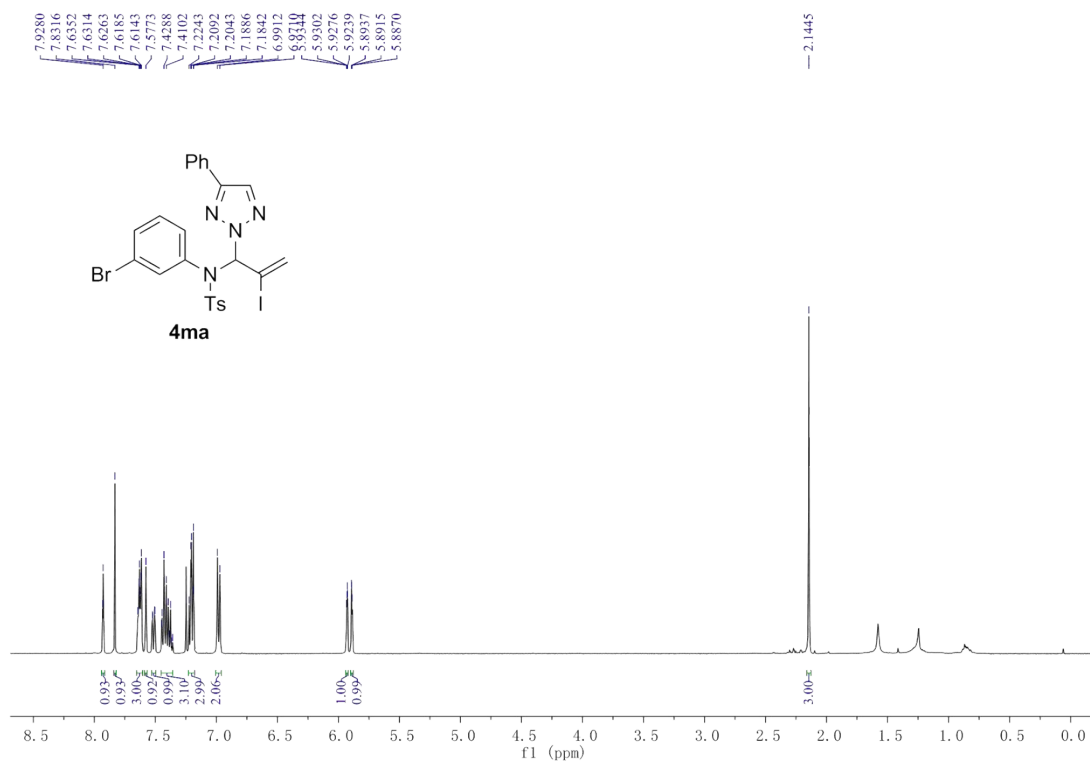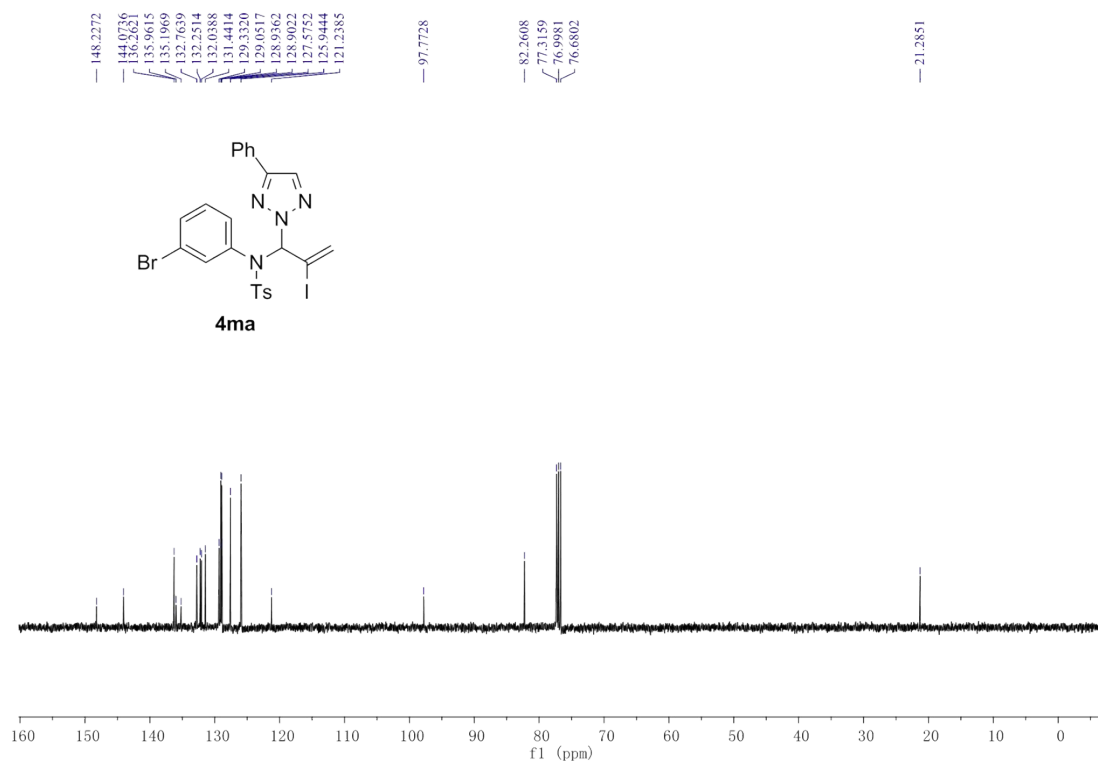

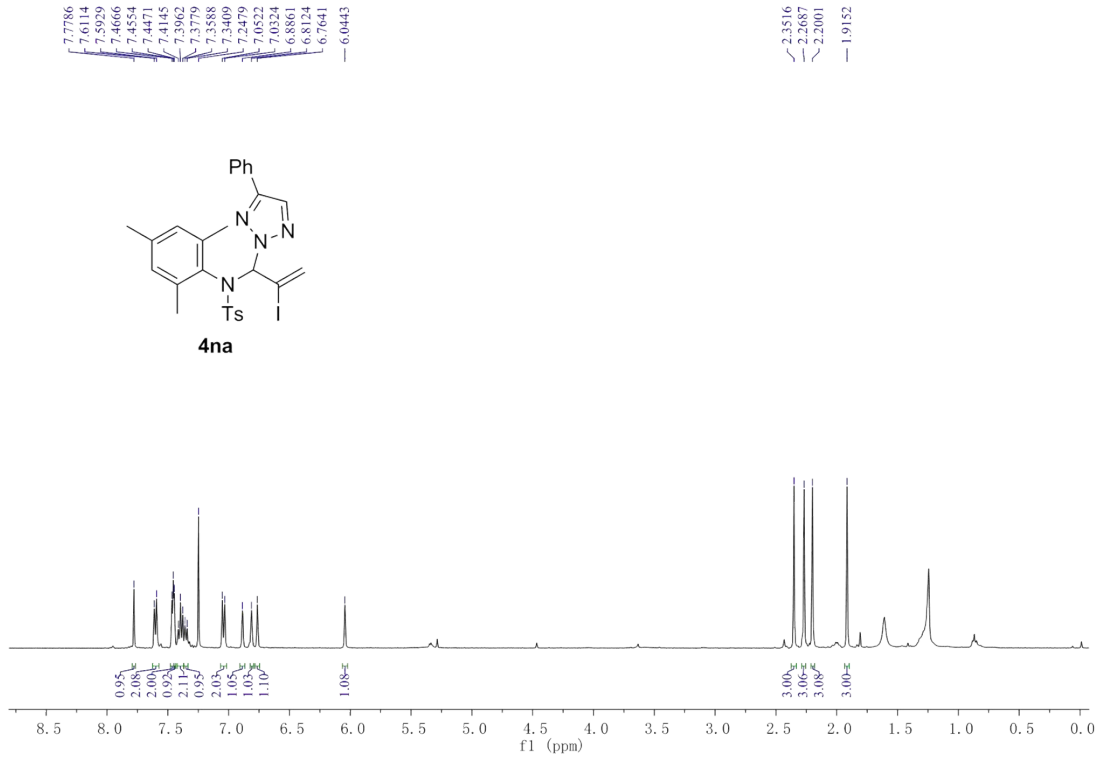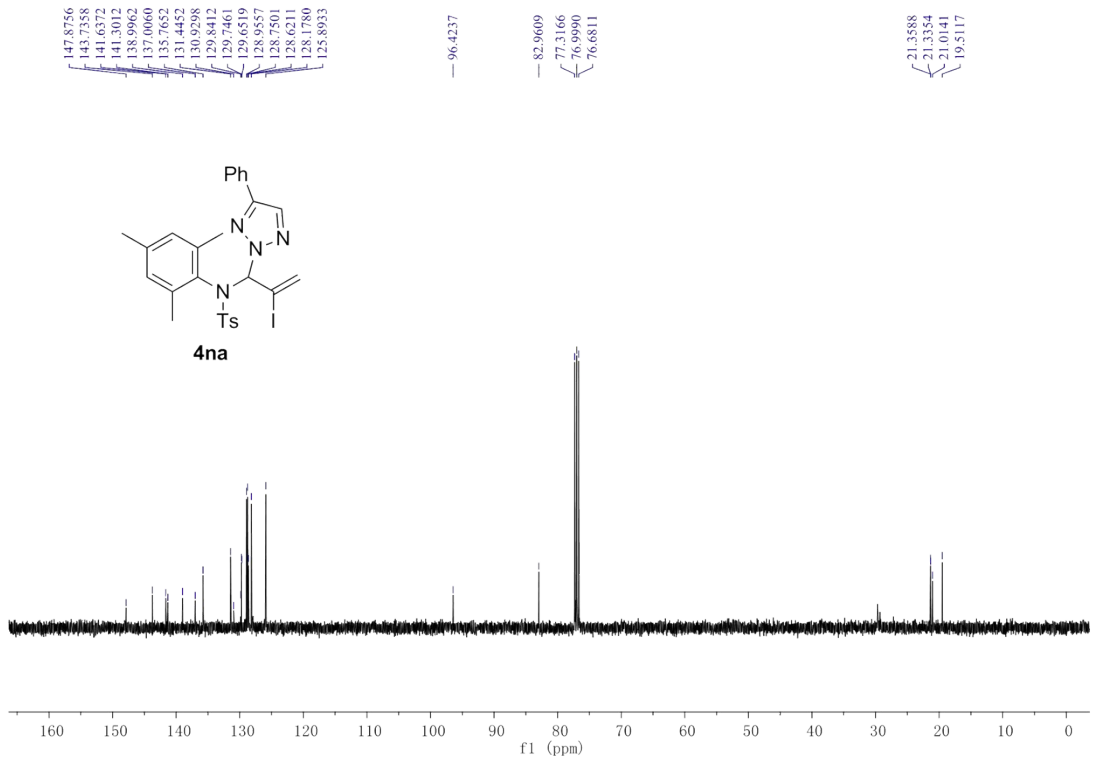

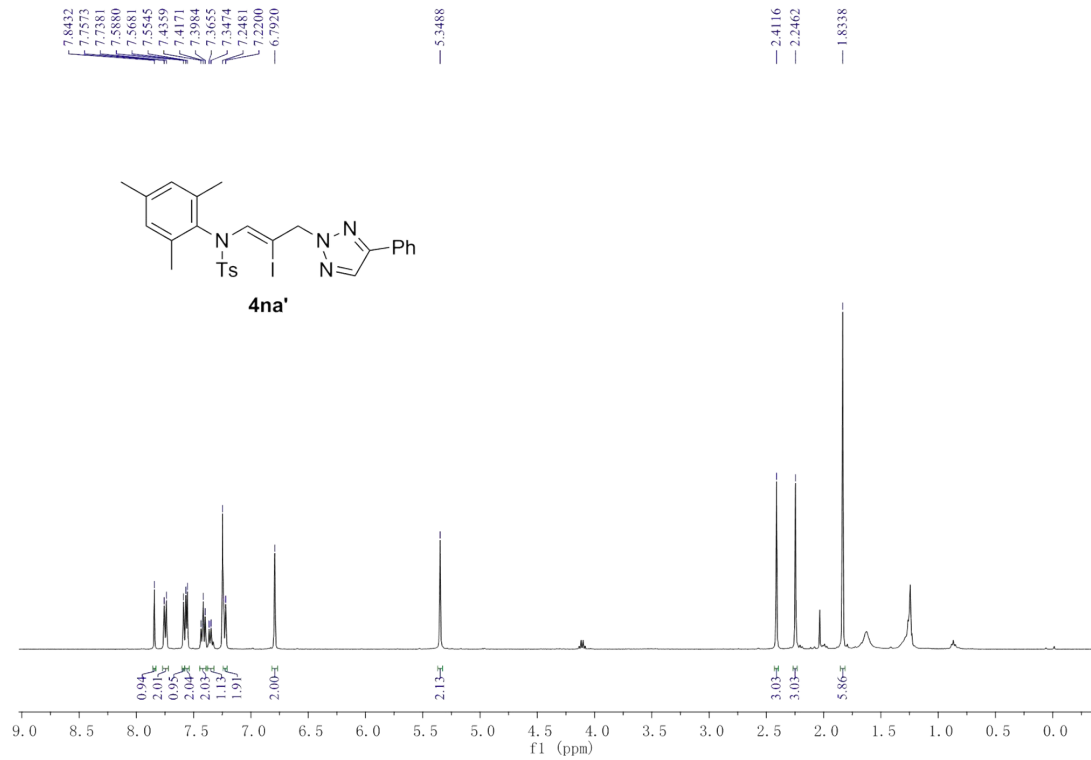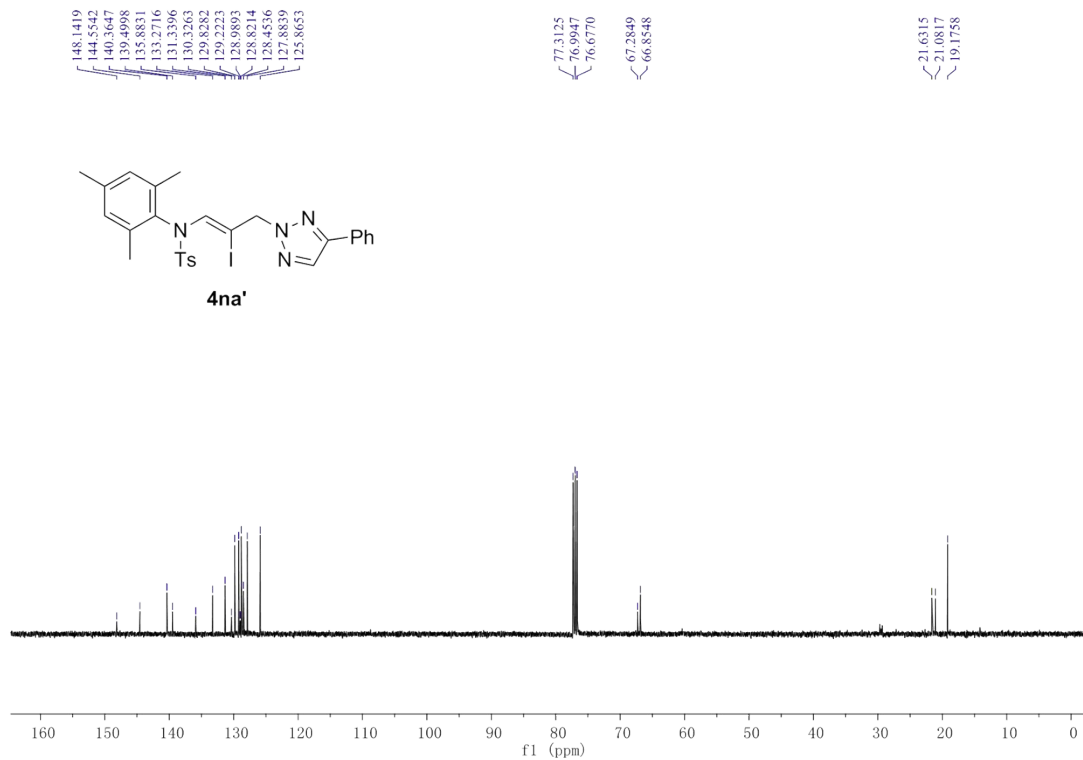



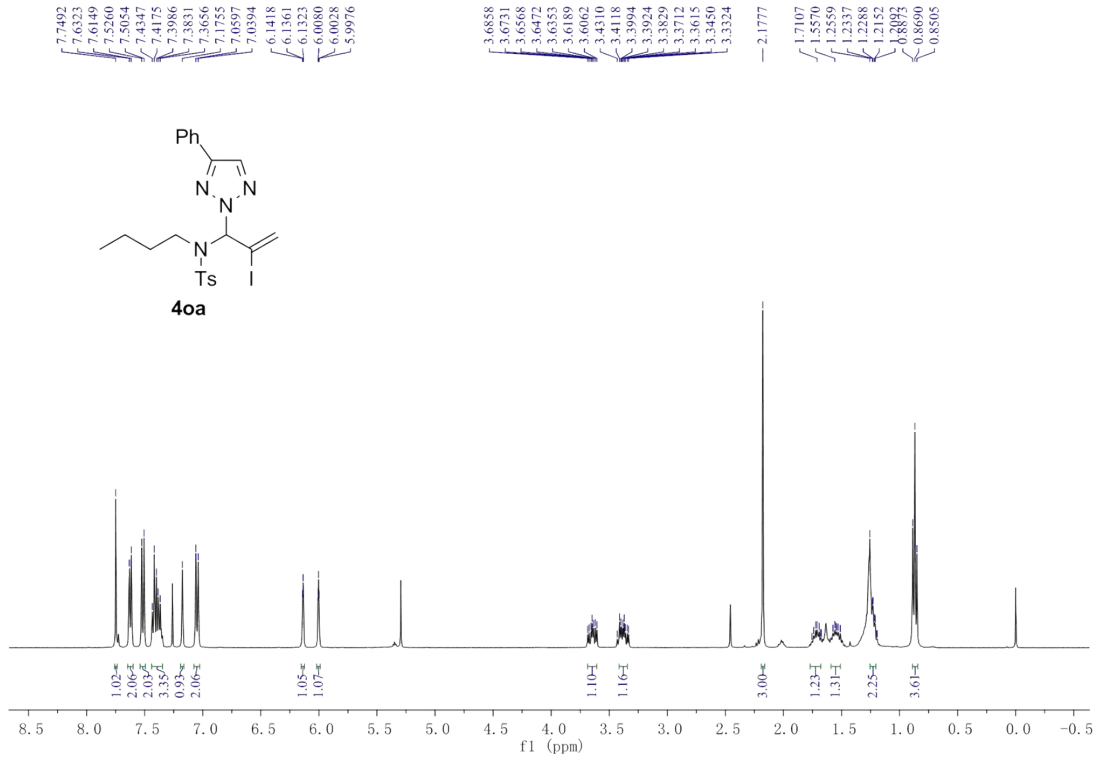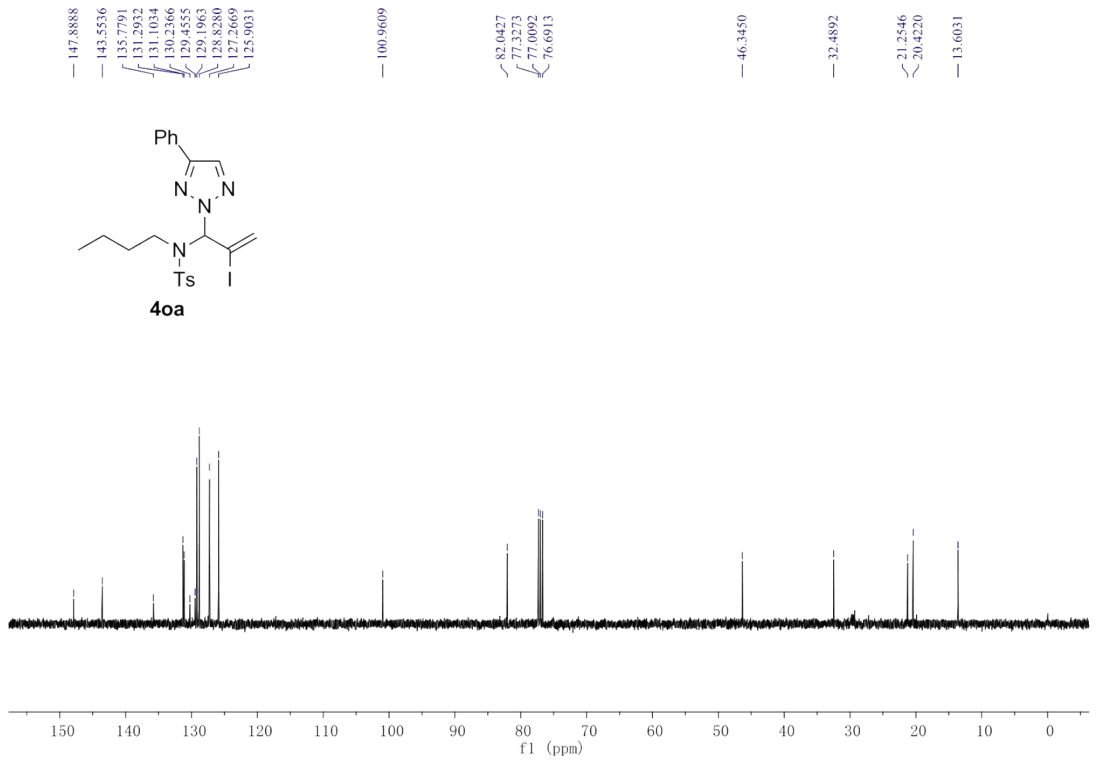

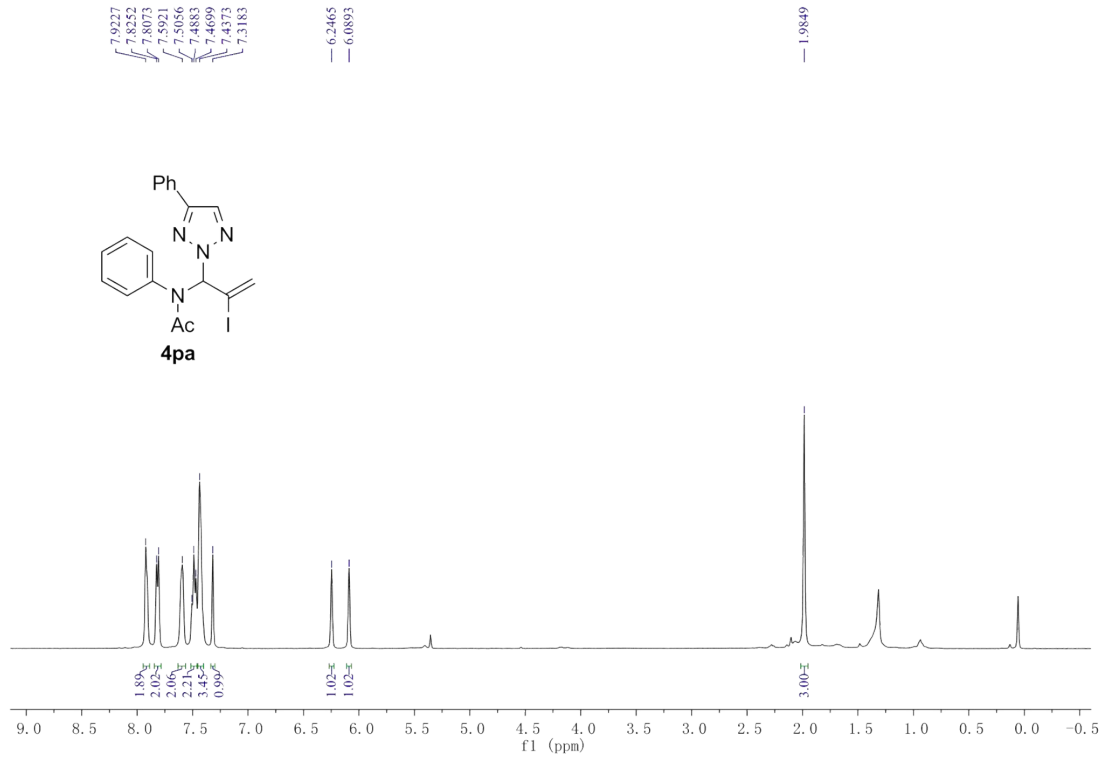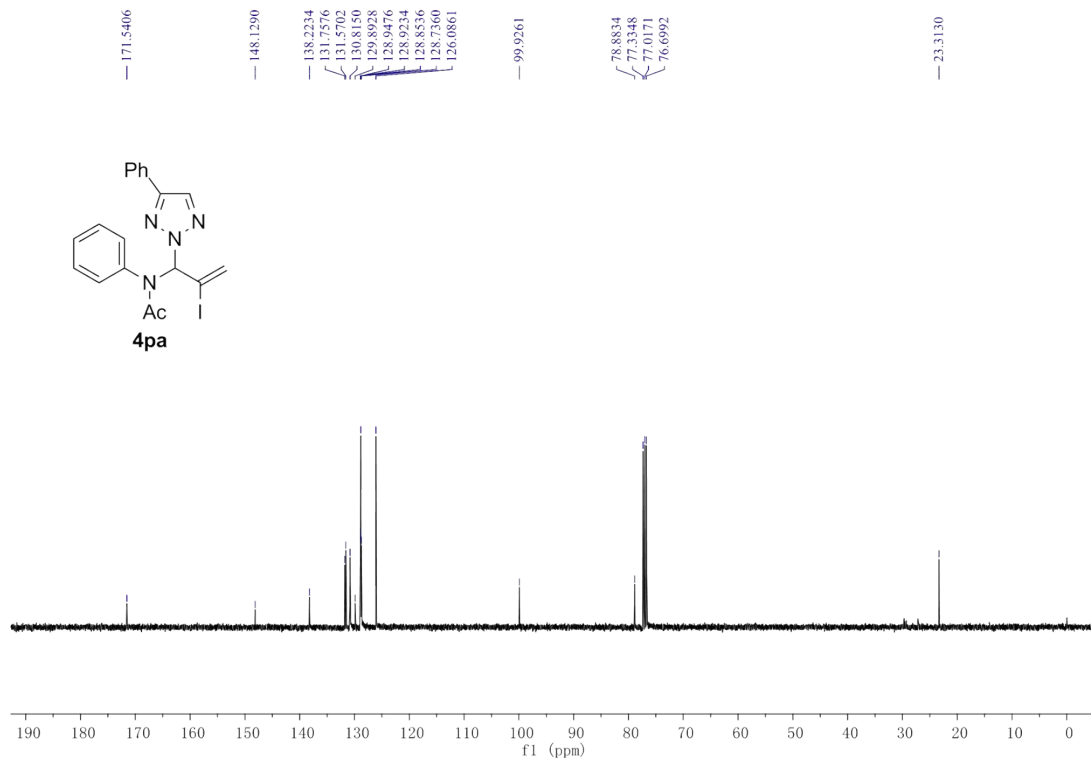

## 2. NMR Spectra for 4ab – 4ak

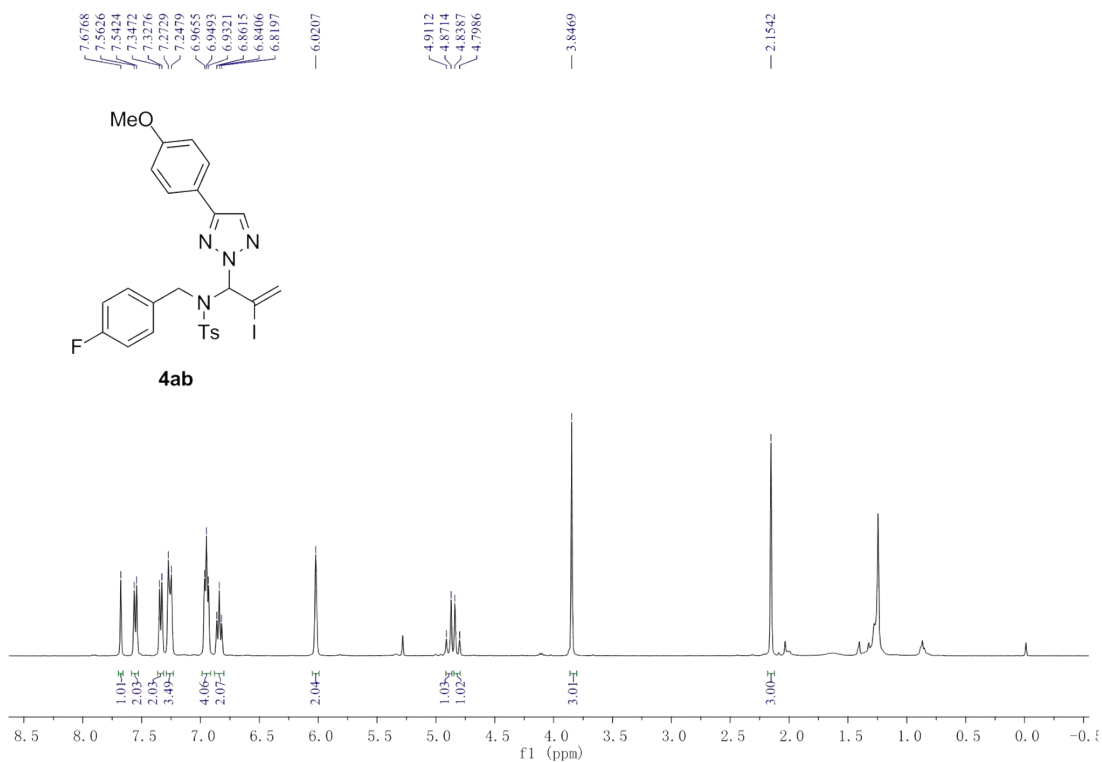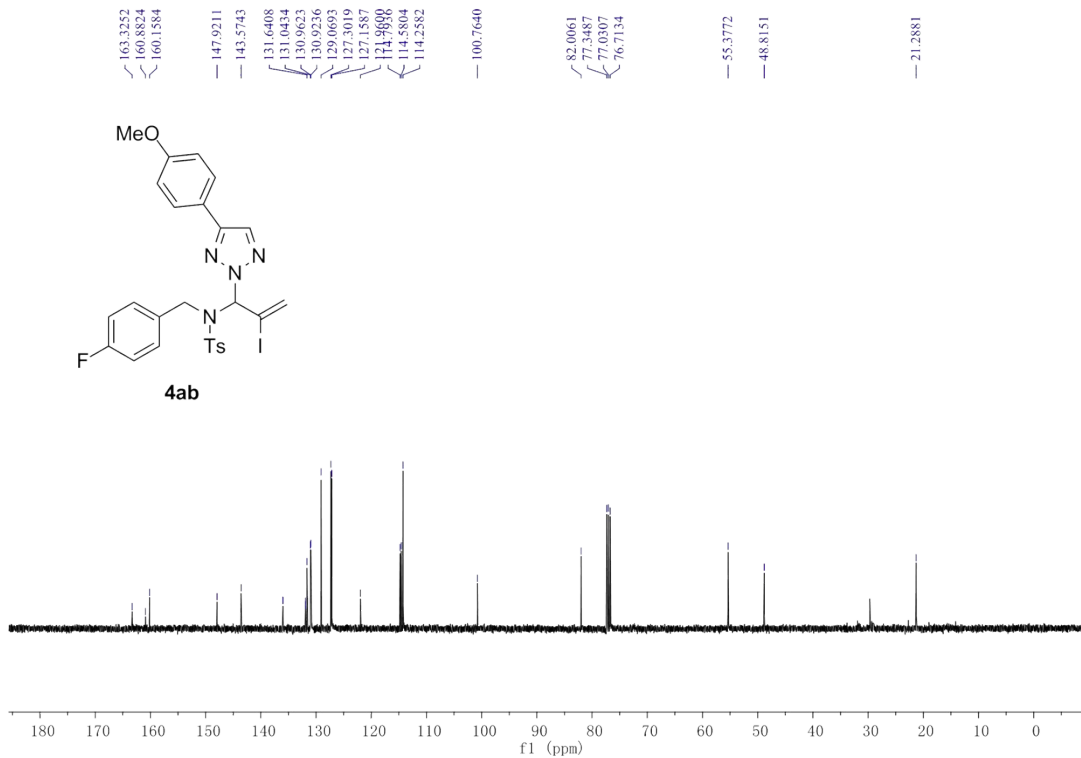

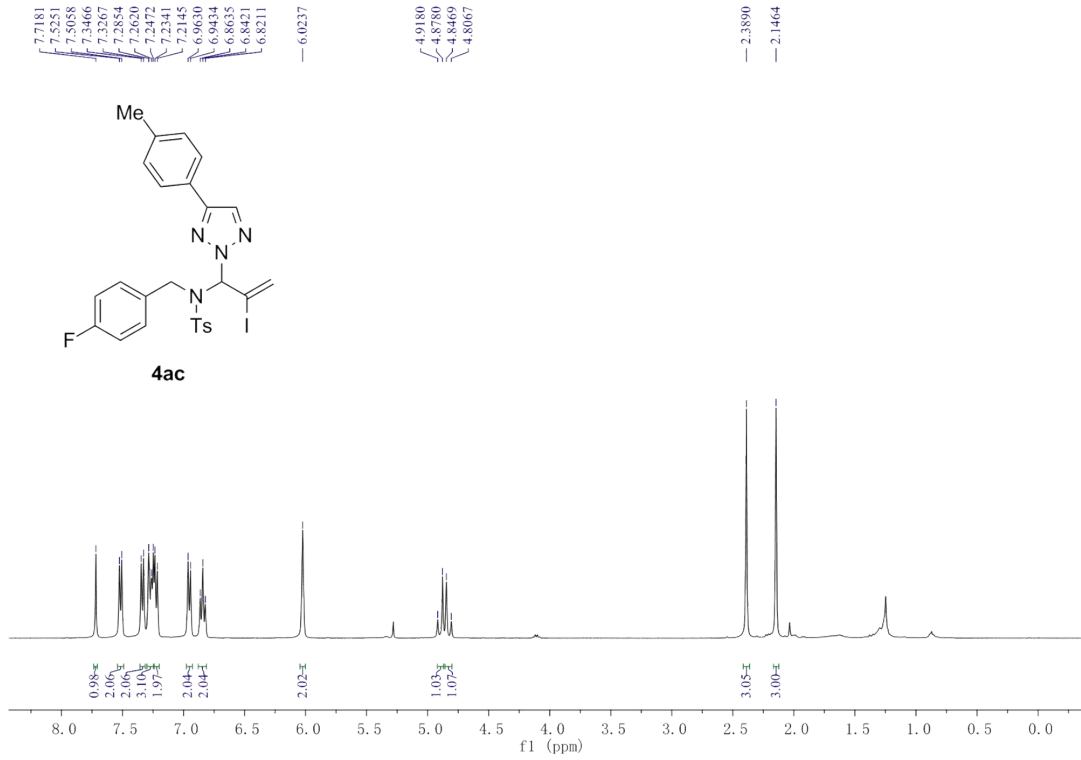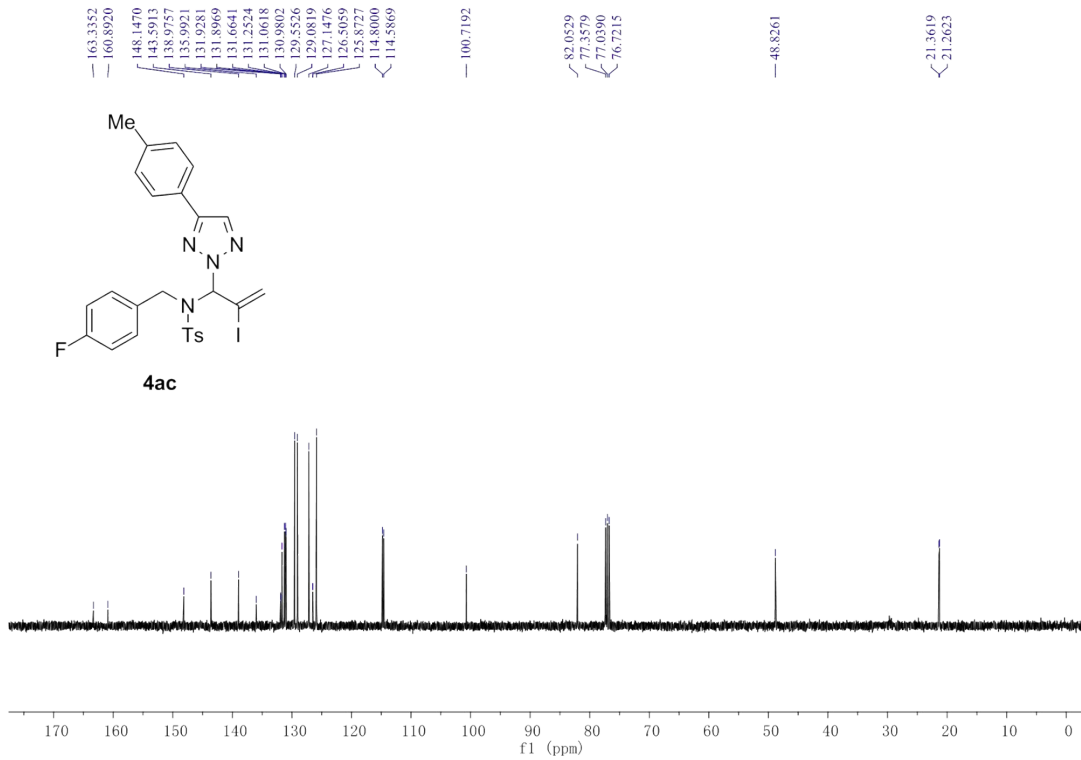

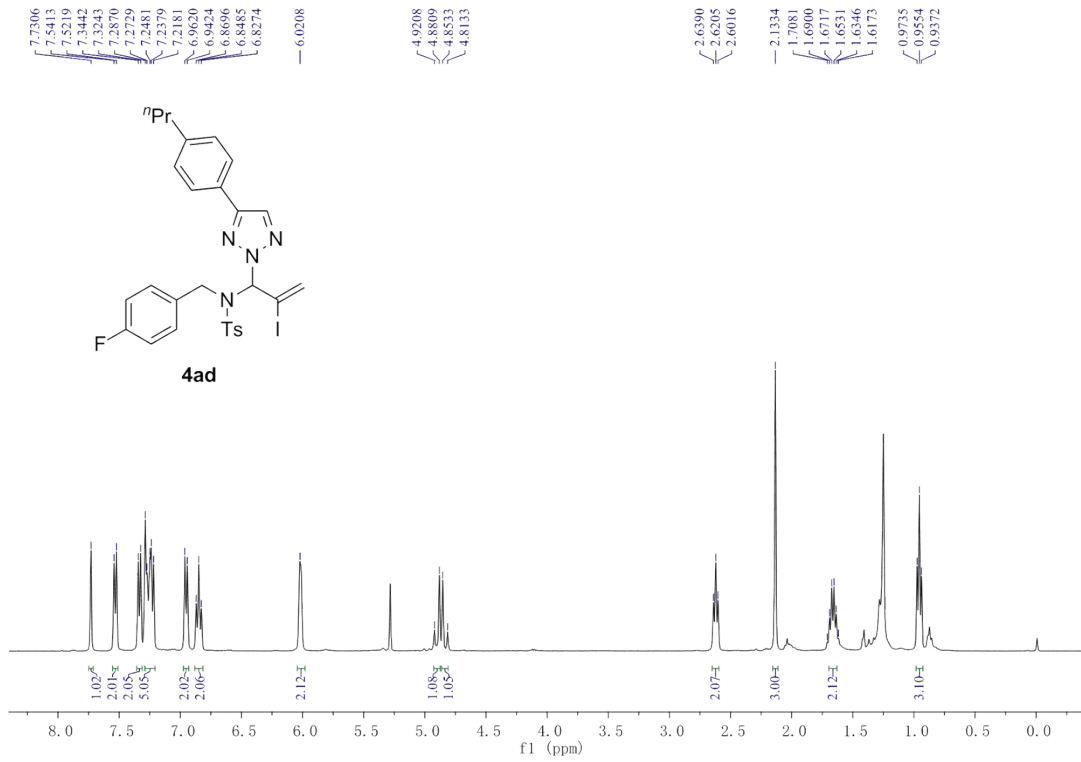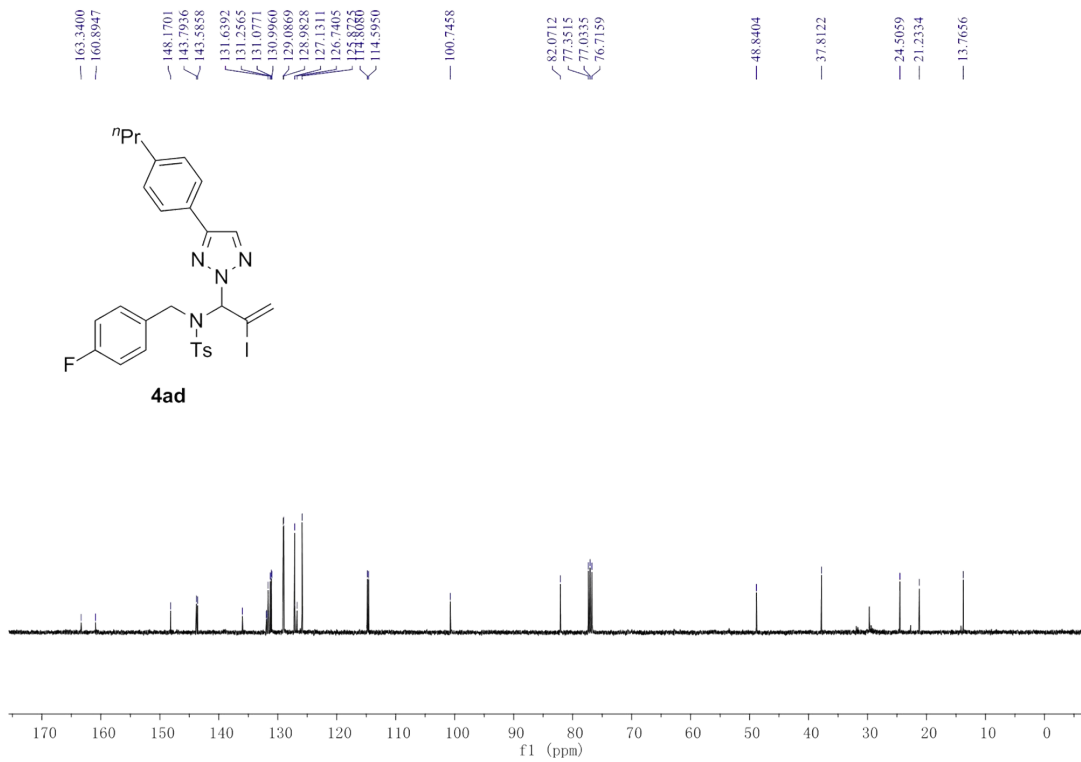

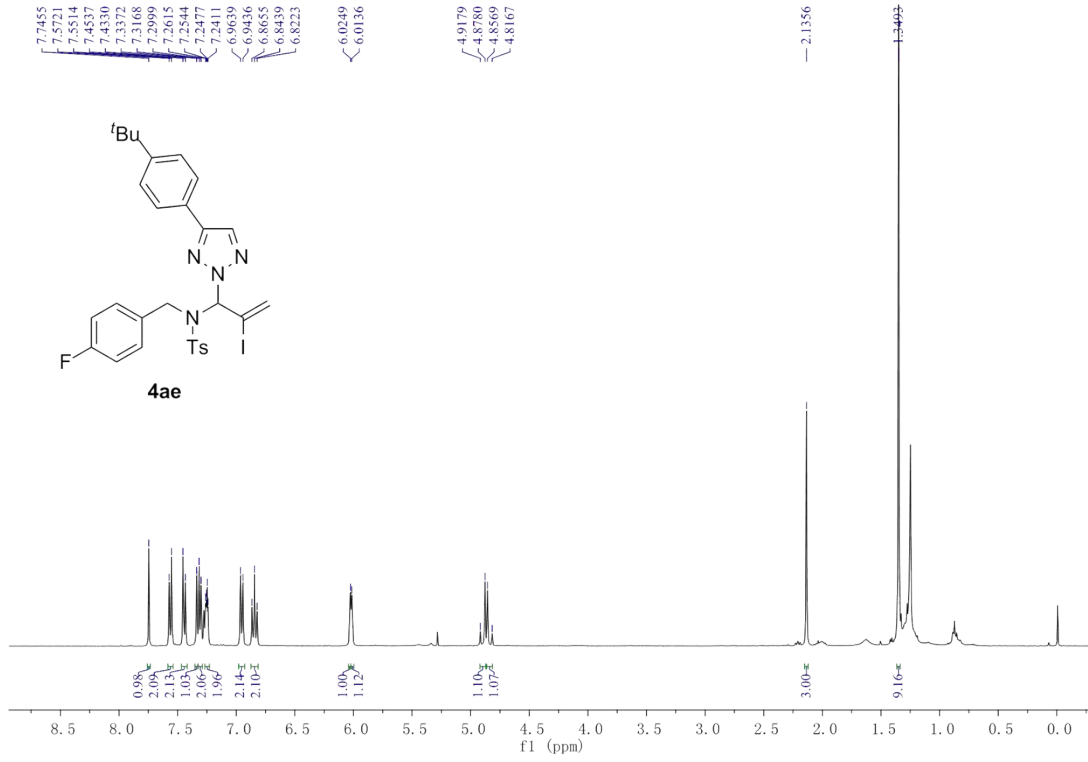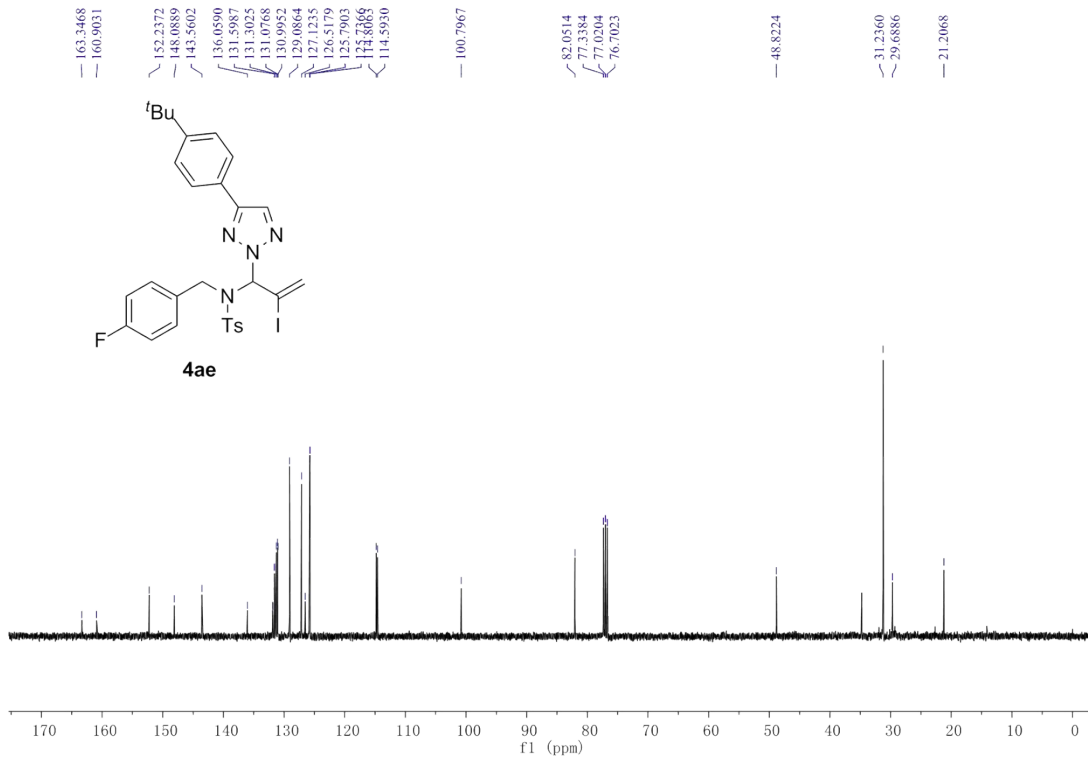

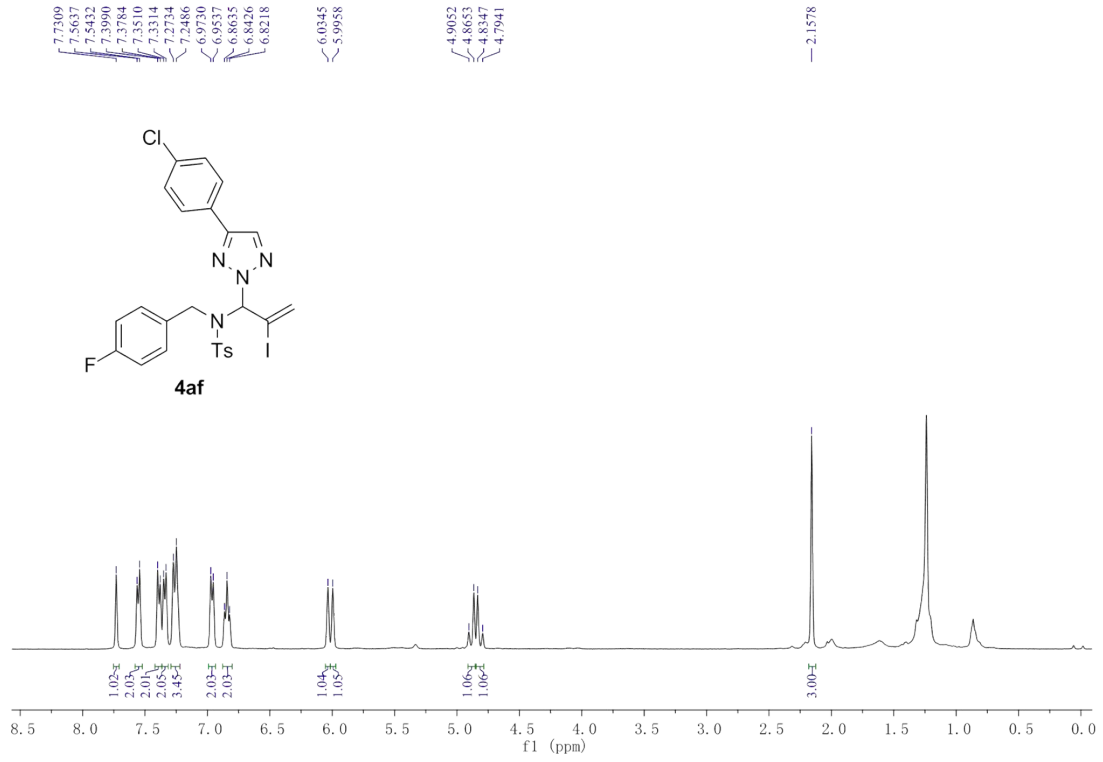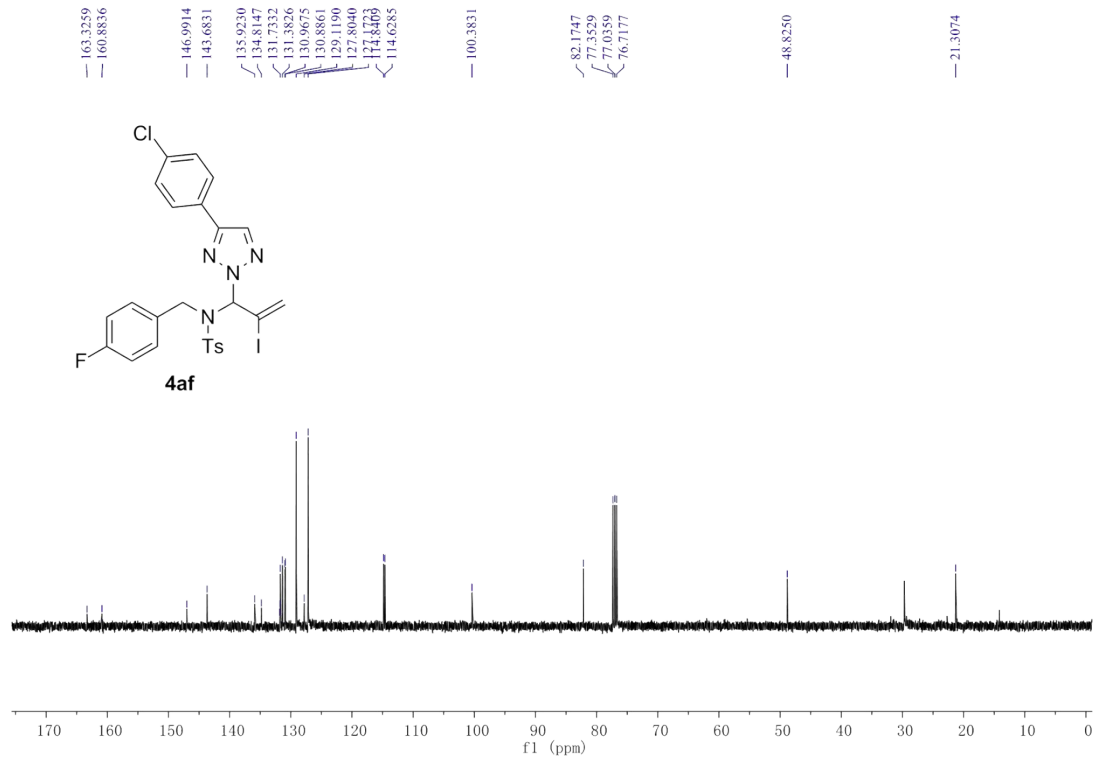

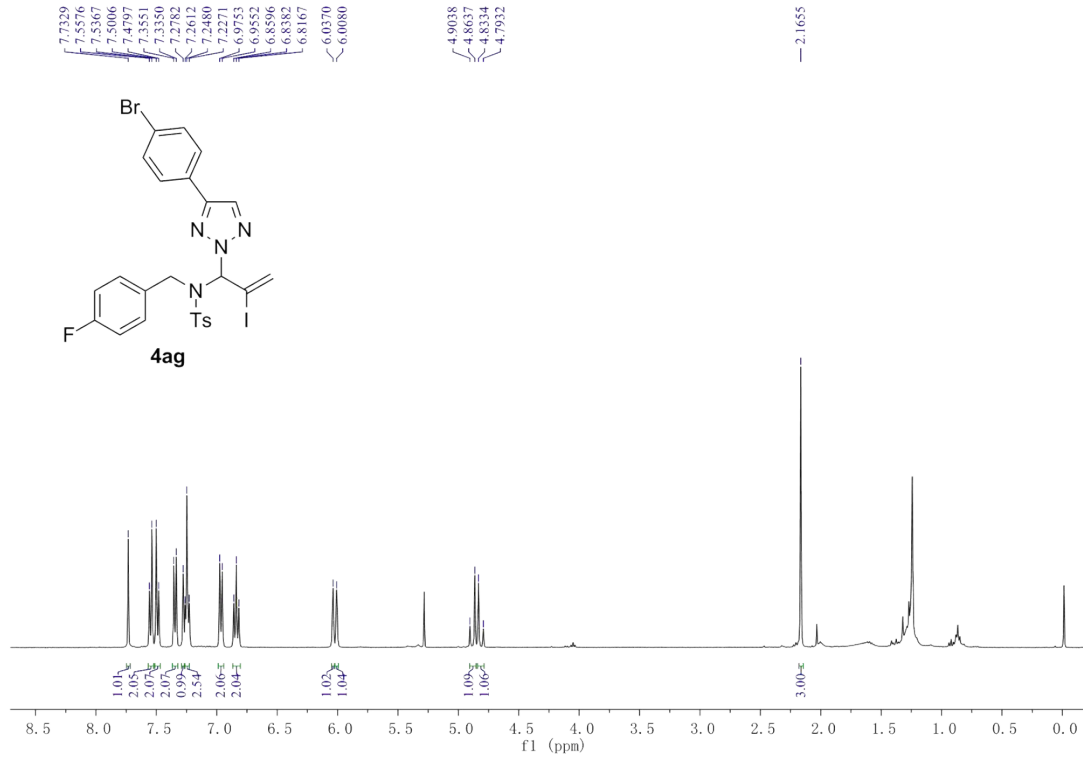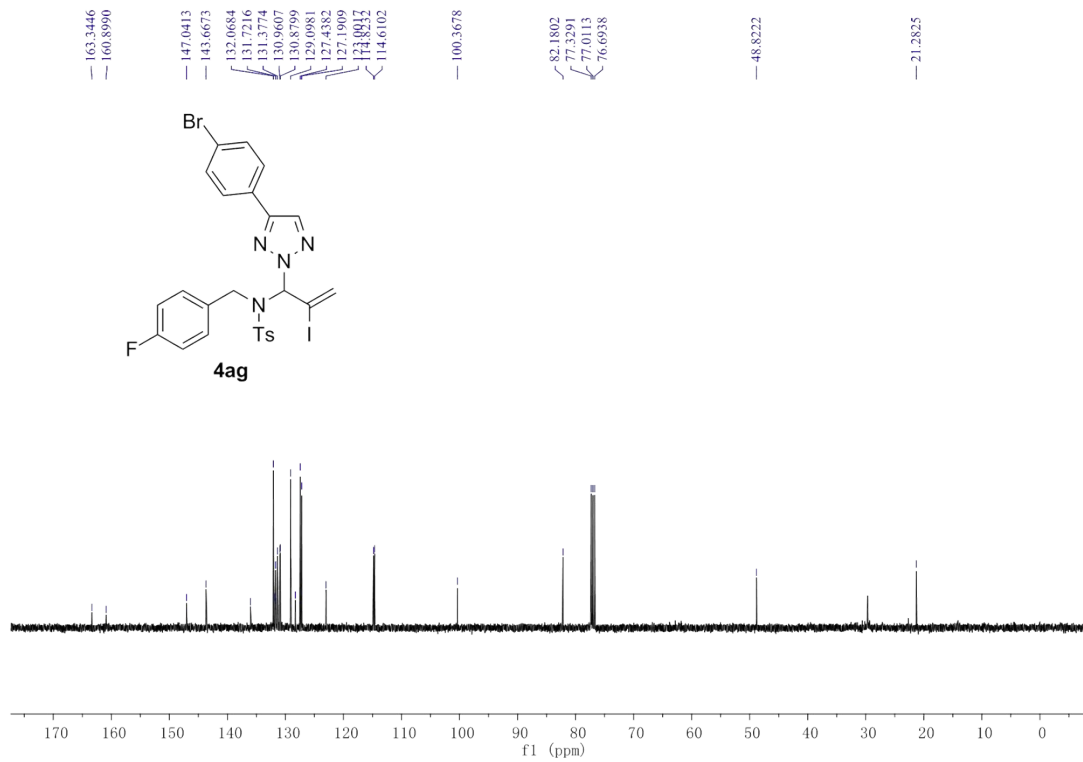



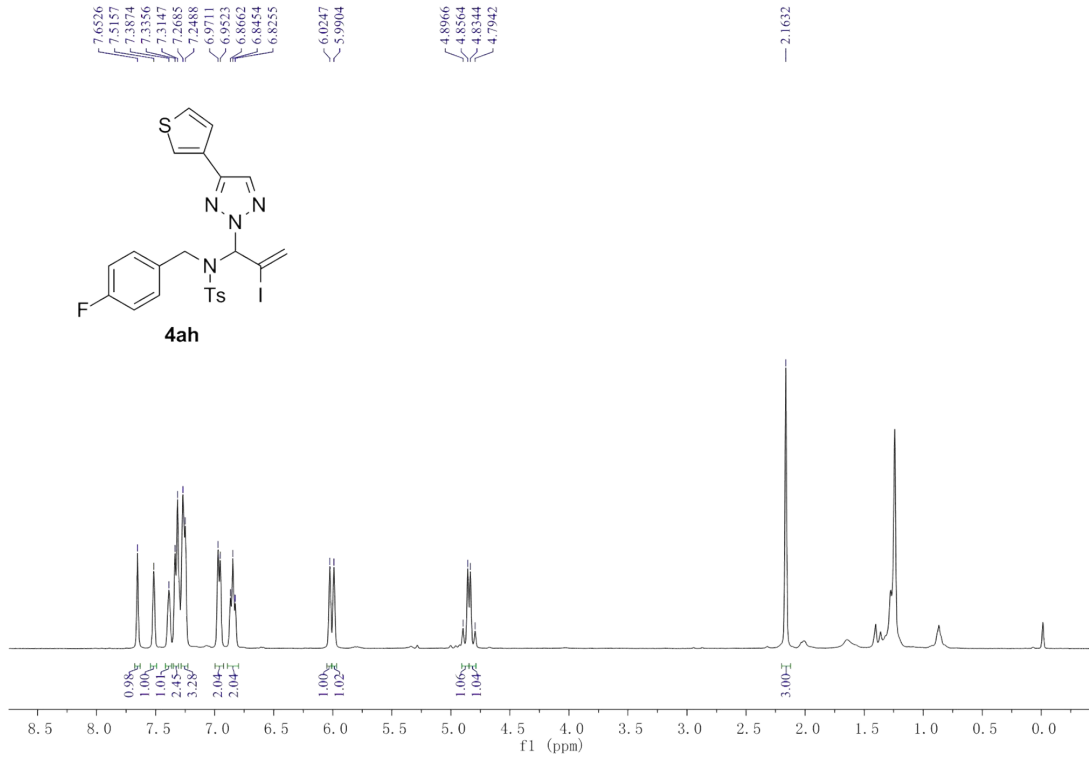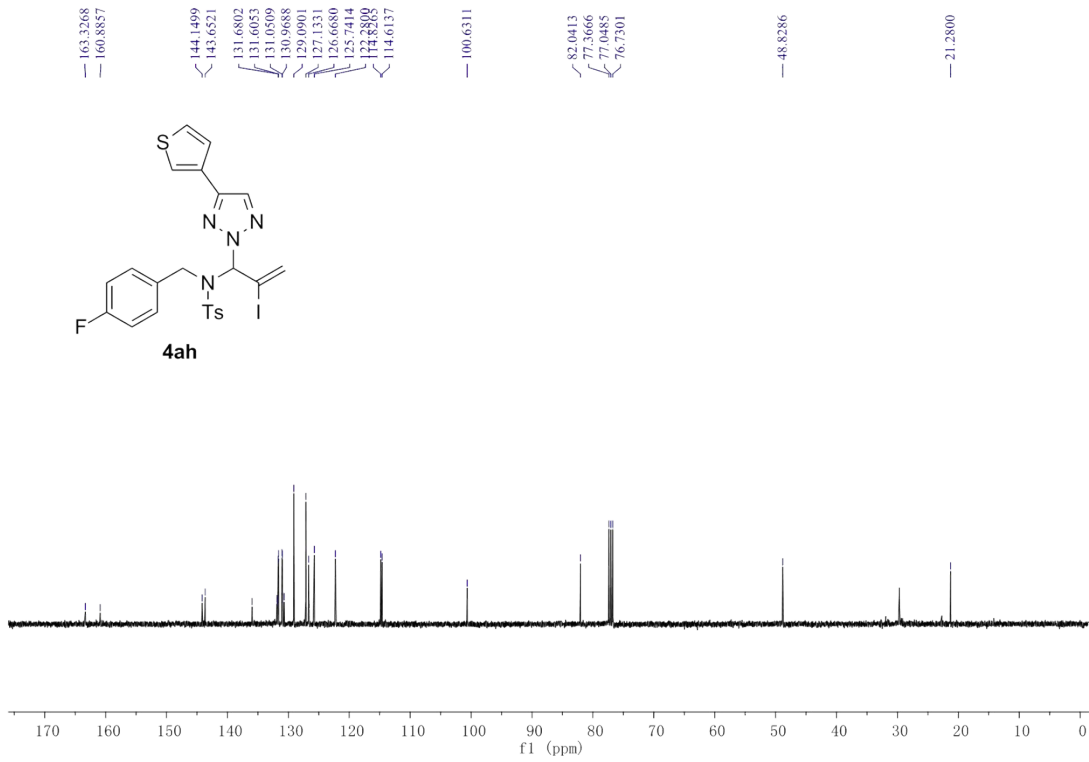

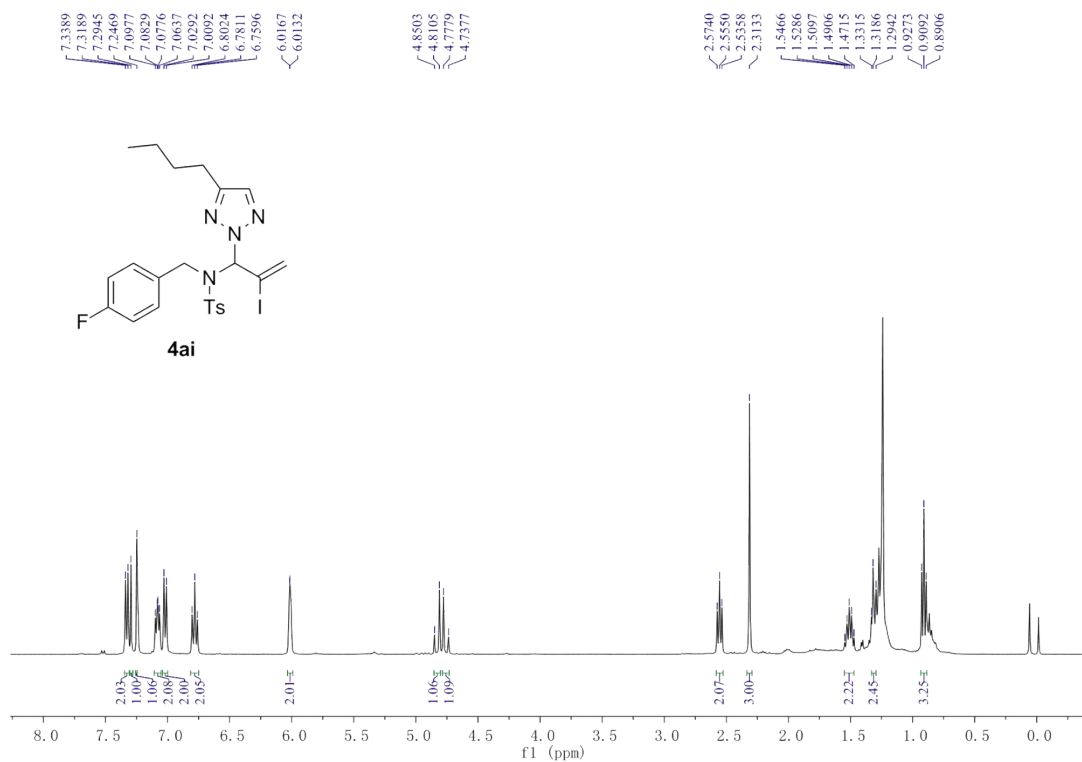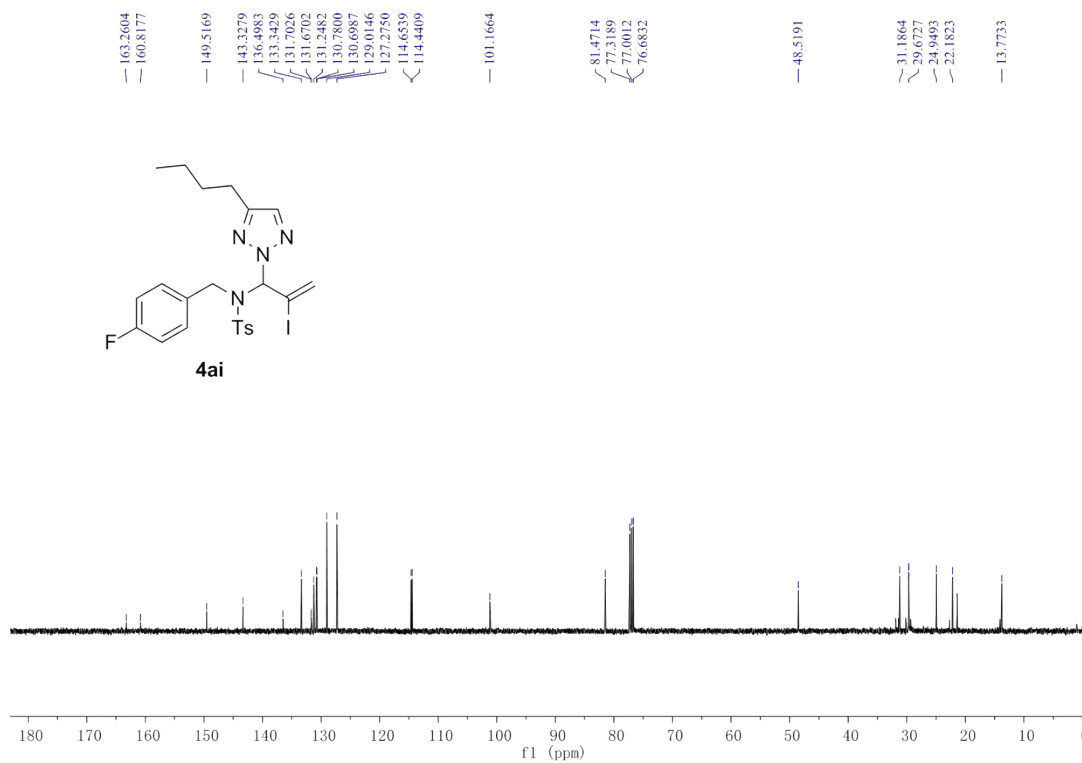

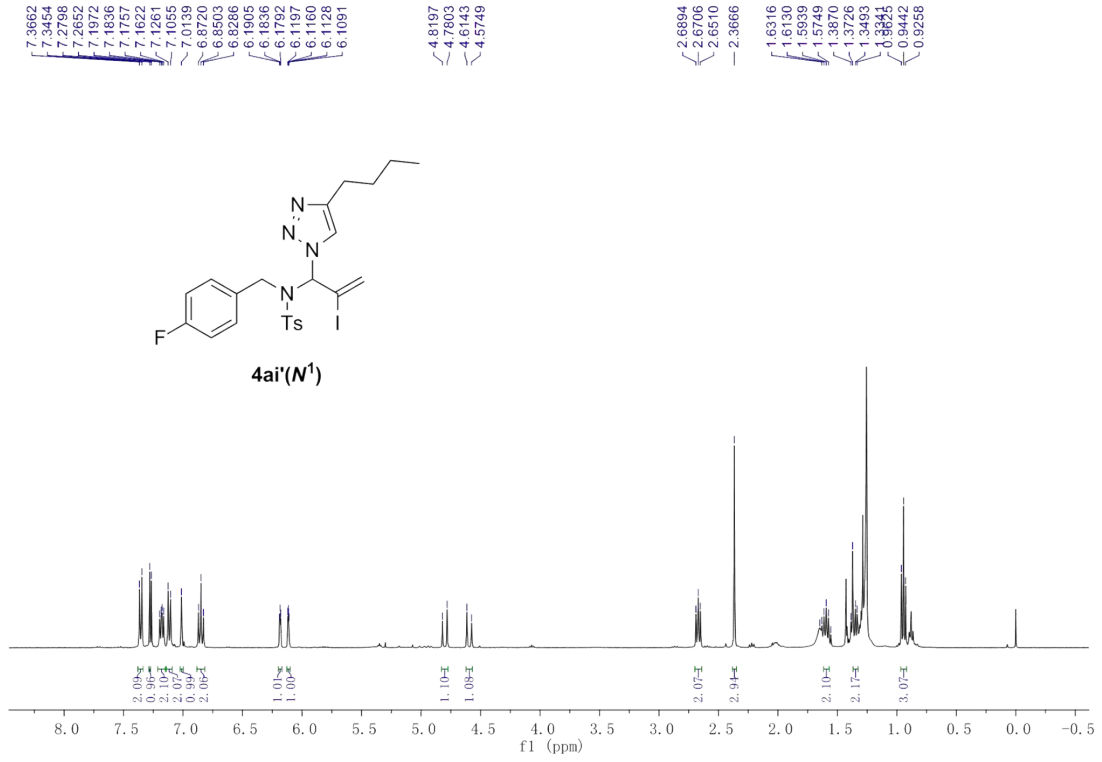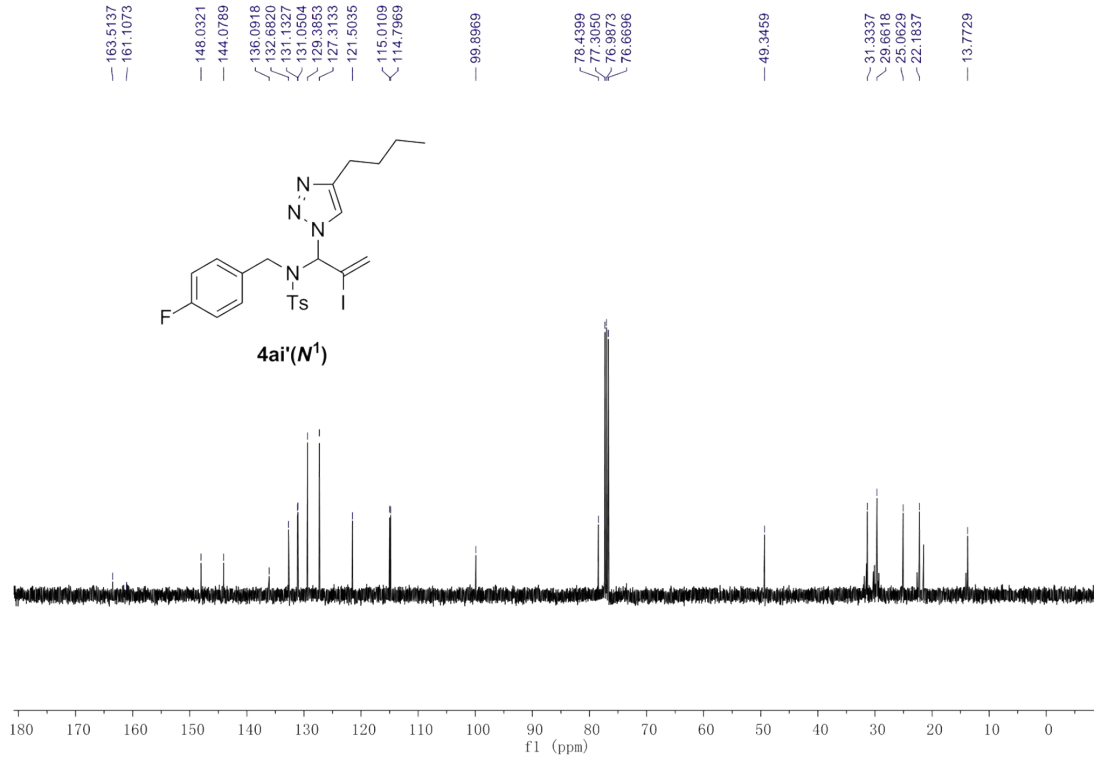

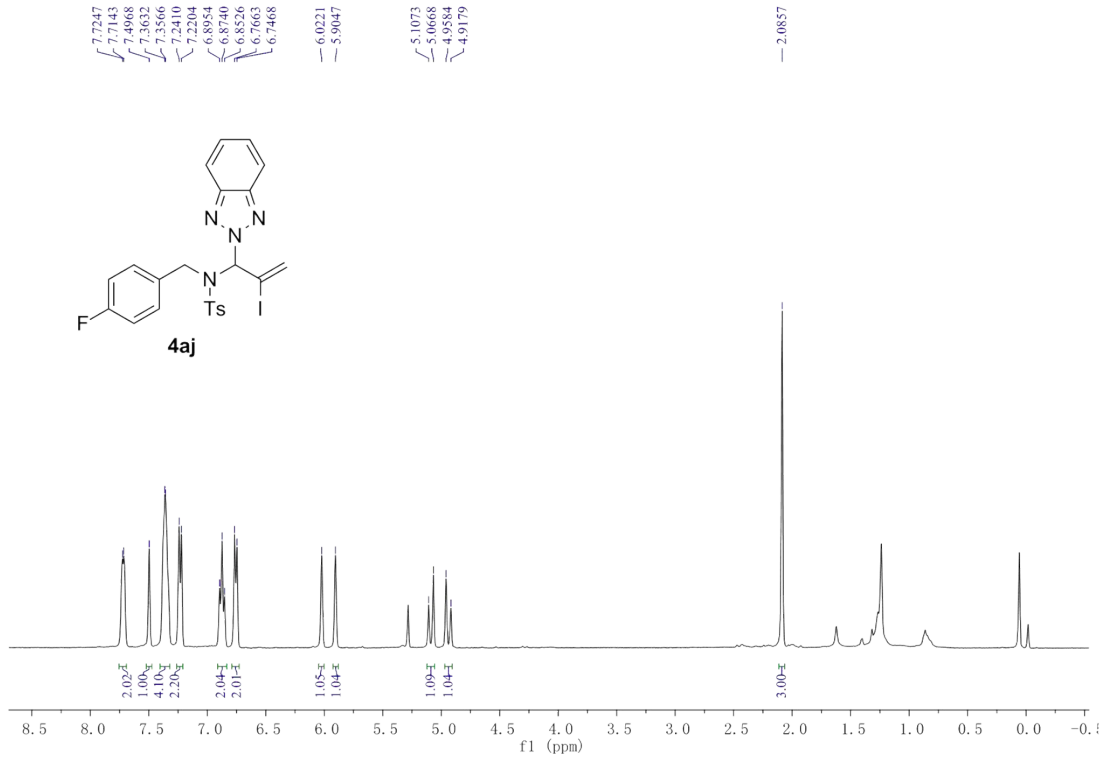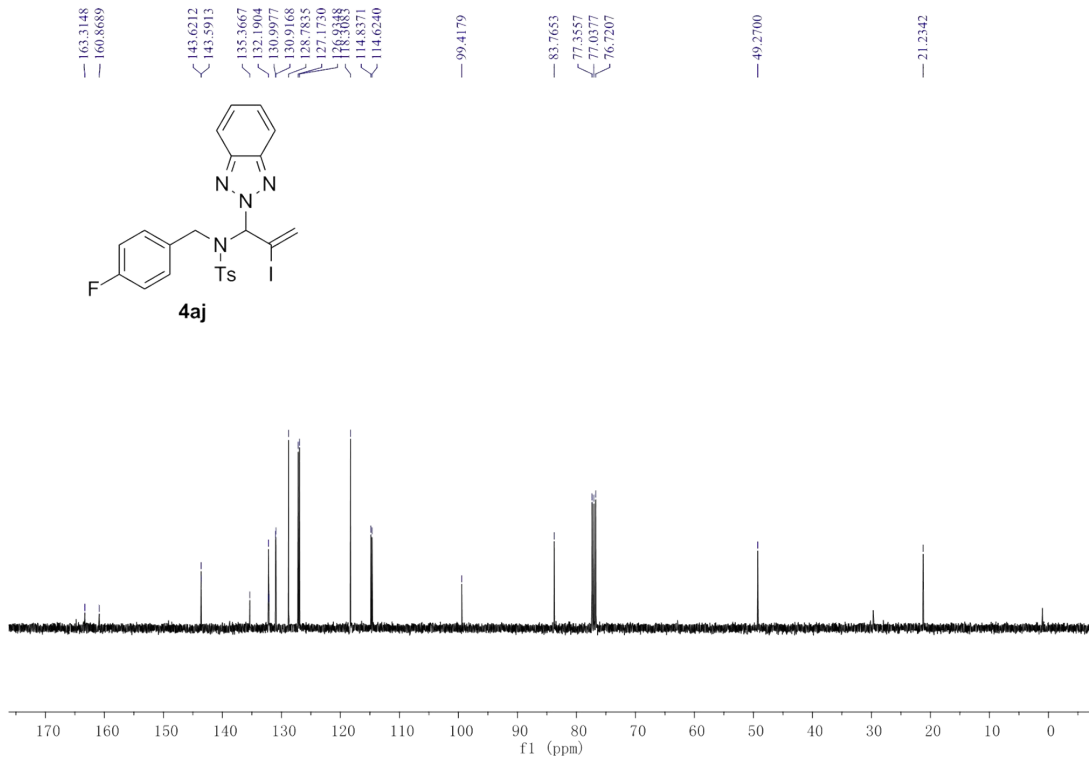

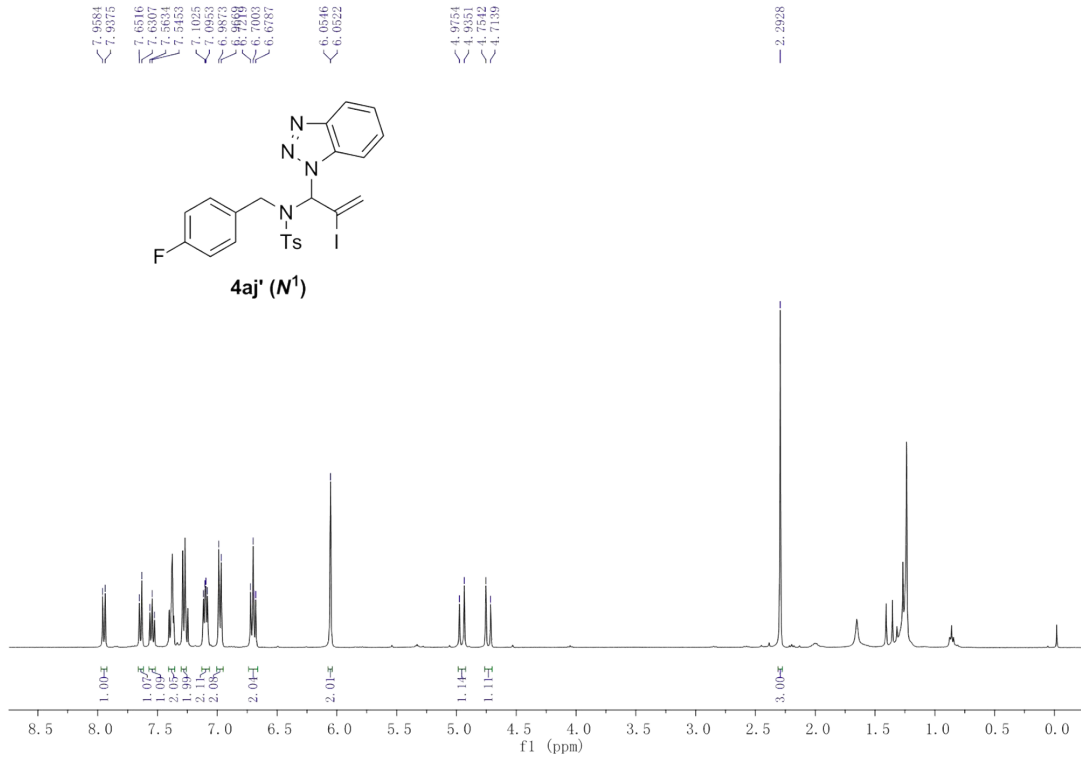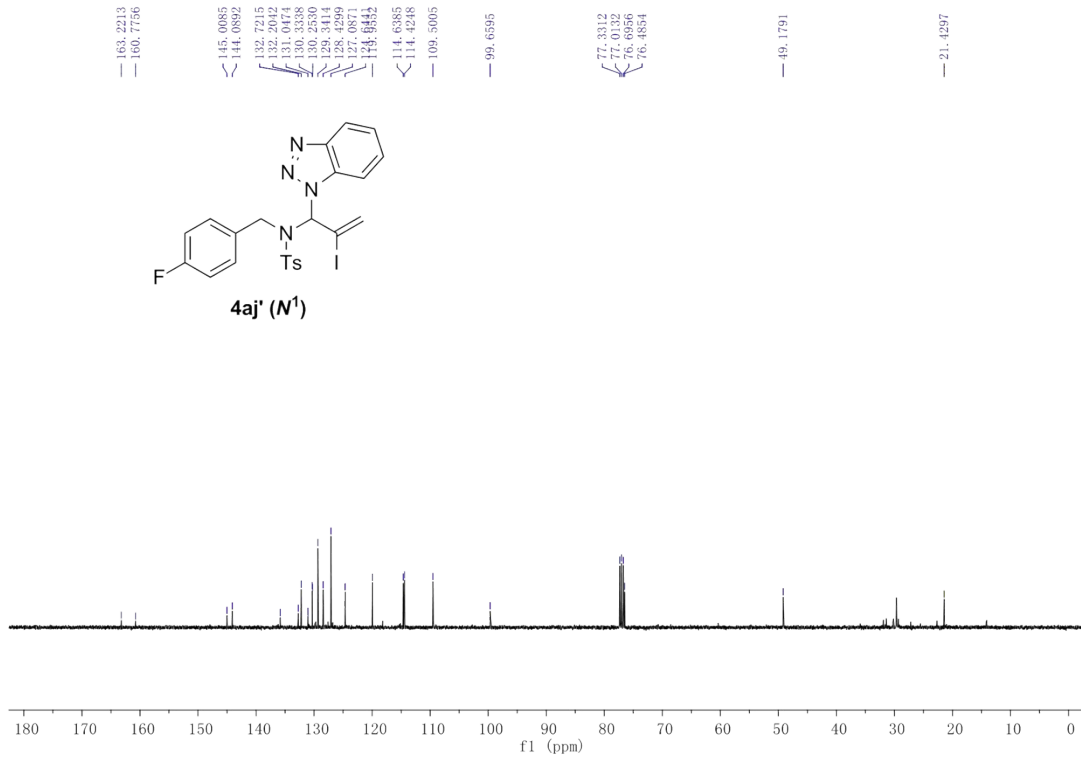

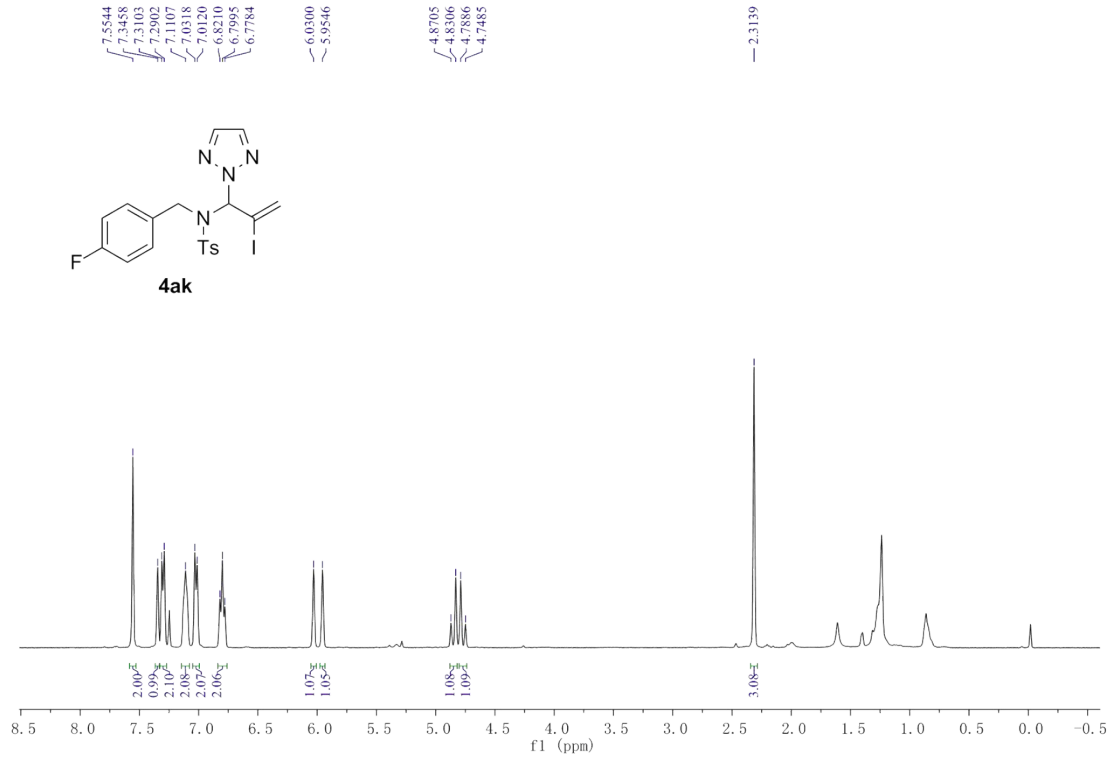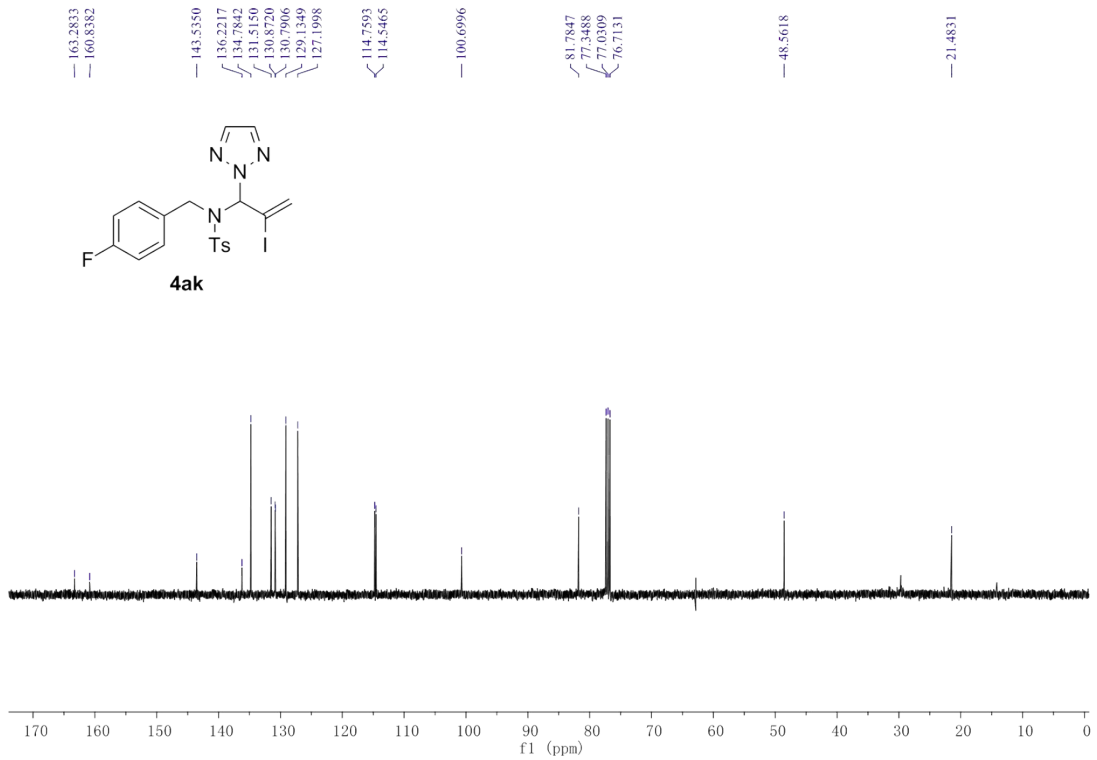

### 3. NMR Spectra for 5

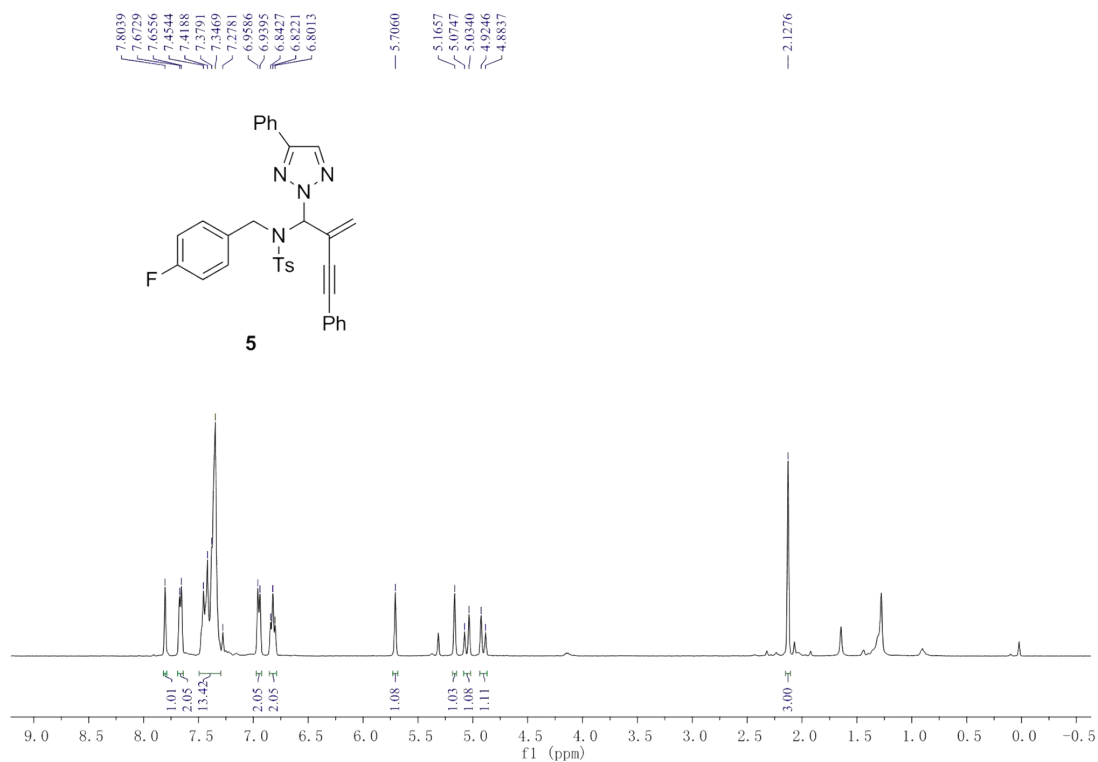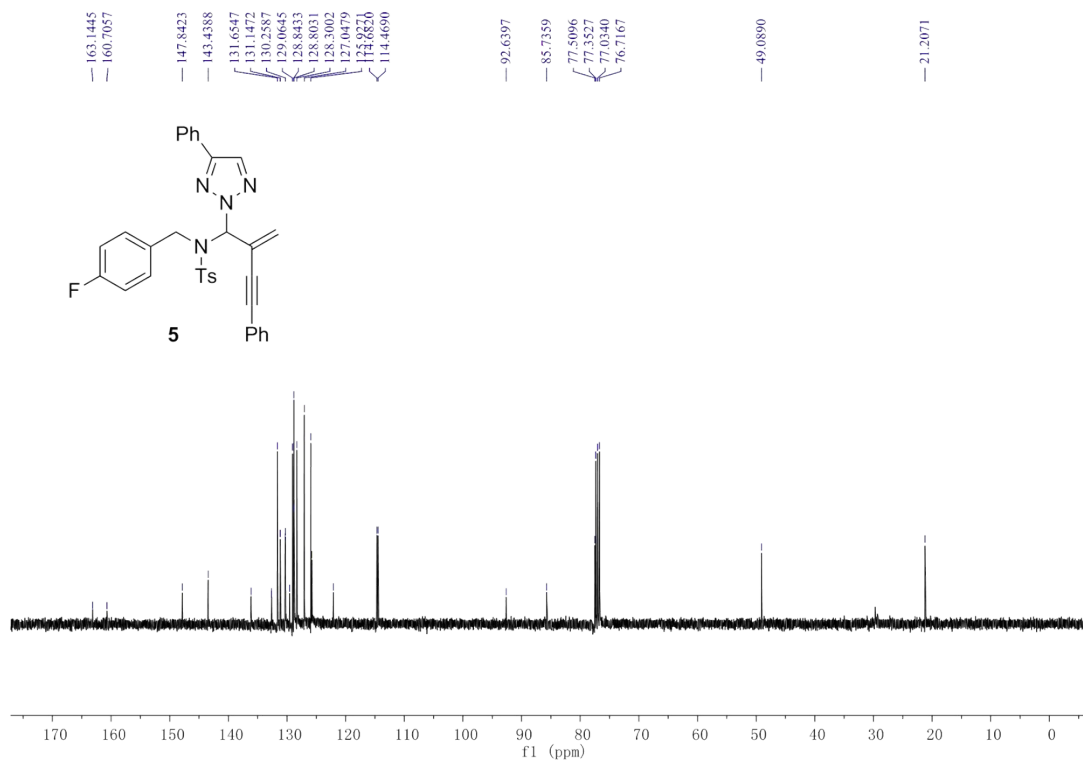

## 4. NMR Spectra for 6

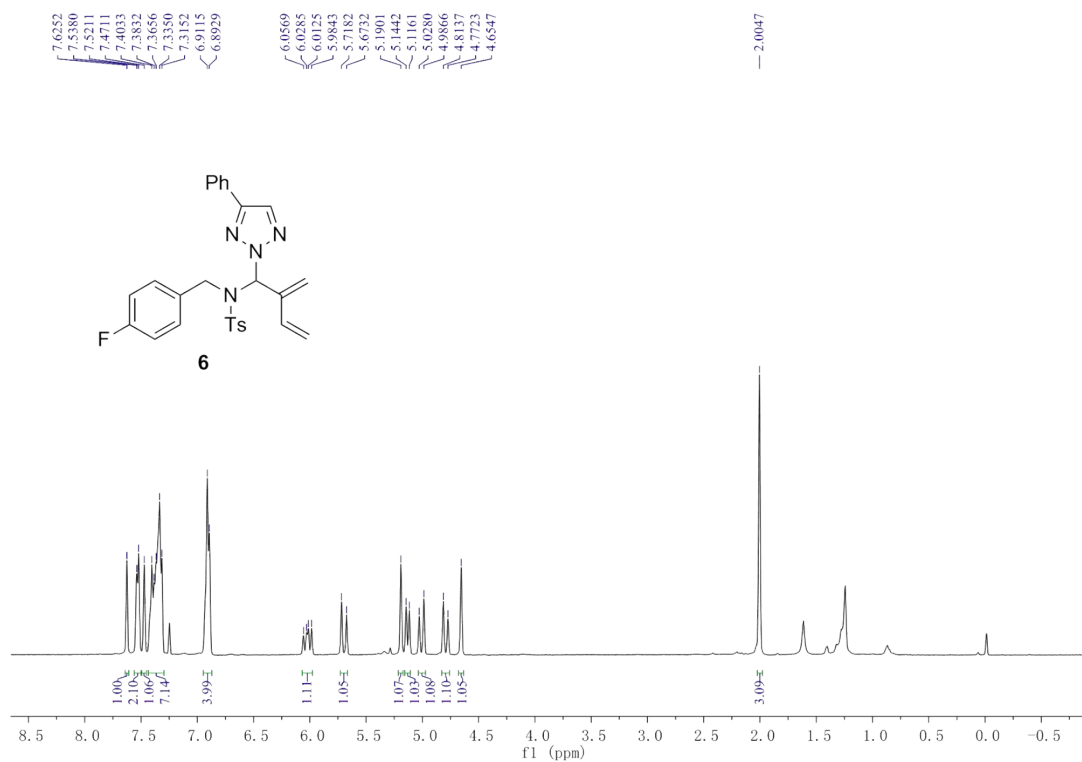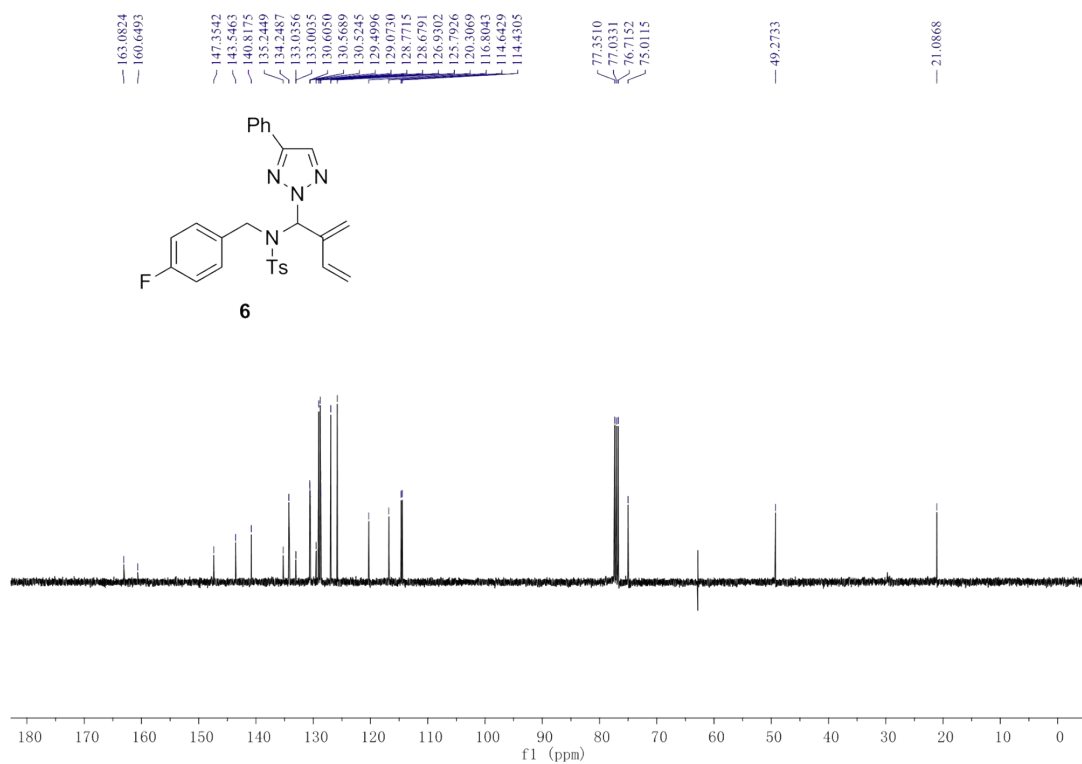

Supplement: c9nj03014j1.pdf [file c9nj03014j1.pdf]
